1 **The damage signal IL-33 promotes a focal protective myeloid cell response**  
2 **to *Toxoplasma gondii* in the brain**

3  
4 Katherine M. Still\*, Samantha J. Batista\*, Jeremy A. Thompson\*, Nikolas W. Hayes\*, Carleigh  
5 O'Brien\*, and Tajie H. Harris\*

6  
7 Affiliations: \*Center for Brain Immunology and Glia, Department of Neuroscience, University of  
8 Virginia, Charlottesville, VA 22908

9  
10 Corresponding Author and Lead Contact:

11 Tajie H. Harris, MR-4 Room 6148, 409 Lane Road, Charlottesville, VA 22908

12 Phone: 434-982-6916

13 Fax: 434-982-4380

14 Email: [tajieharris@virginia.edu](mailto:tajieharris@virginia.edu)

15  
16 This work was funded by National Institutes of Health grants R01NS091067 to T. H. H.,  
17 T32GM008328 to K. M. S. and J. A. T., T32AI007046 to S. J. B., and T32AI007496 to C. A. O.  
18 and a University of Virginia School of Medicine R&D grant.

19

20 **SUMMARY**

21

22 An intact immune response is critical for survival of hosts chronically infected with

23 *Toxoplasma gondii*. We observe clusters of macrophages surrounding replicating parasite in brain

24 tissue, but the initial cues which instruct focal inflammatory reactions in the central nervous

25 system (CNS) are not well understood. One potential mechanism of broad relevance is host cell

26 damage. Here we find that IL-33, a nuclear alarmin, is critical for control of *T. gondii* parasites in

27 the brain. IL-33 is expressed by oligodendrocytes and astrocytes during *T. gondii* infection, and a

28 loss of nuclear IL-33 staining is observed in association with replicating *T. gondii* in infected mouse

29 and human brain tissue, suggestive of IL-33 release. IL-33 signaling is required for induction of

30 chemokines in astrocytes, including focal CCL2 production as visualized using CCL2-mCherry

31 reporter mice. Bone marrow chimera experiments support the hypothesis that IL-33 could be

32 acting directly on astrocytes, as the relevant IL-33-responding cell is radio-resistant. In alignment

33 with CCL2 induction, IL-33 signaling is required for the infiltration of CCR2<sup>+</sup> myeloid cells that

34 express anti-parasitic iNOS locally. These results expand our knowledge of alarmin signaling in

35 the brain, an environment which is unique from the periphery and demonstrates the importance

36 of a single damage signal in focal control of *T. gondii* infection in the CNS.

37

## 38 INTRODUCTION

39

40 *Toxoplasma gondii* is a eukaryotic parasite which encysts in the brain parenchyma of its  
41 hosts, including humans and mice<sup>1-3</sup>. Mortality from *T. gondii* infection is associated with  
42 conversion of the latent cyst form to fast-replicating parasites within CNS tissue. Increased  
43 prevalence of parasite replication has been documented in immunosuppressed patients  
44 undergoing transplant surgeries<sup>4</sup>, HIV-AIDS patients<sup>5-7</sup>, and in congenital infection<sup>8</sup>. Murine *T.*  
45 *gondii* infection features natural cyst formation with spontaneous reactivation and serves as a  
46 model for understanding how protective immune responses are generated in the brain<sup>9,10</sup>.

47 A Th1-dominated immune response to *T. gondii* is essential for control of murine  
48 infection<sup>1,2</sup>. Depletion of T-cell derived IFN- $\gamma$  during brain infection results in rapid mortality<sup>11</sup>. IFN-  
49  $\gamma$  can stimulate anti-parasitic effector responses in macrophages, such as the production of  
50 reactive nitrogen species<sup>2</sup>. Macrophage-derived inducible nitric oxide synthase (iNOS) is effective  
51 at limiting parasite replication via direct toxicity and depletion of arginine *in vitro*<sup>2,12</sup>. iNOS is also  
52 vital to survival of chronic brain infection *in vivo*<sup>13,14</sup>. We find that blood-derived iNOS-expressing  
53 macrophages form foci around reactivated parasite during chronic infection. But how  
54 macrophages are recruited to the brain in response to *T. gondii*, and how they are instructed to  
55 reach specific sites within brain tissue where *T. gondii* is replicating is unclear.

56 During the acute, systemic stage of infection, the pattern recognition receptors TLR11 and  
57 TLR12 and Nod-like receptors NLRP1 and NLRP3 are involved in the activation of the immune  
58 system<sup>15-18</sup>, but how and if *T. gondii* is recognized in the brain is not yet characterized. Sensing of  
59 damage-associated molecular patterns, however, may be a mechanism of broad relevance by  
60 which blood-derived myeloid cells are directed to the brain. Here we focus on a nuclear alarmin,  
61 IL-33, which acts as an amplifier of immune responses throughout the body<sup>19-21</sup>. Interestingly, *T.*  
62 *gondii*-infected mice deficient for the IL-33 receptor have been reported to exhibit brain pathology

63 and increased parasite burden, but the impact of IL-33 signaling on immune cell recruitment has  
64 not been addressed<sup>22</sup>.

65 IL-33 is expressed in barrier tissues in the periphery, including the lung, gut, and skin,  
66 where it serves as a sentinel for barrier tissue disruption and is best known for its role in promoting  
67 type 2 immune responses during asthma, allergy, and helminth infection<sup>19-21,23</sup>. Because this  
68 nuclear protein does not contain a secretory signal peptide and does not require processing to be  
69 active, it is proposed to be released upon necrotic cell death<sup>19,21,24</sup>. Following its release, IL-33  
70 acts on a heterodimer of the IL-1 receptor accessory protein (IL-1RacP) and its cognate receptor  
71 ST2 to initiate classical MyD88-NF- $\kappa$ B signaling which upregulates expression of chemokines and  
72 cytokines<sup>20,21</sup>. In the periphery, IL-33 can signal on a gamut of ST2-expressing cells of  
73 hematopoietic origin; those most commonly studied are type 2 innate lymphoid cells (ILC2s), mast  
74 cells, and regulatory T cells<sup>20,21,25</sup>. The ultimate effect of IL-33 signaling depends heavily on the  
75 responding cell type and environmental milieu and can serve either an inflammatory or  
76 homeostatic function<sup>25</sup>.

77 IL-33 is more highly expressed in the brain and spinal cord than any other tissue<sup>23</sup>, but its  
78 roles are only beginning to be described in the CNS. Nuclear IL-33 is expressed by astrocytes  
79 and myelinating oligodendrocytes in the healthy, adult mouse brain parenchyma<sup>26,27</sup>. Like IL-33  
80 expression, IL-33 signaling during pathology in the brain likely differs from the periphery. ST2-  
81 expressing immune cells are physically separated from IL-33 expressing cells in the parenchyma  
82 by the BBB in a naïve state and would likely be unable to respond to initial insult<sup>26,28-31</sup>. Therefore,  
83 it is unknown if the generation of an immune response to brain pathology would necessitate IL-  
84 33 signaling on a brain-resident cell type. Nonetheless, IL-33 has been recently demonstrated to  
85 be beneficial in responding to insults affecting the parenchyma, including mouse models of  
86 Alzheimer's disease<sup>32</sup> and stroke<sup>33</sup>, in which peripherally-administered IL-33 had beneficial effects  
87 on disease outcome. The mechanisms by which endogenous IL-33 generates immunity to various  
88 brain insults are still being defined.

89            Here we show that IL-33-expressing glia are lost in regions of replicating parasite within  
90 brain tissue. We report that IL-33 signals on a brain-resident responder to recruit blood-derived  
91 myeloid cells to the *T. gondii* infected brain. We find IL-33 impacts focal inflammation, inducing  
92 localized chemokine expression and iNOS production in macrophages. Although IL-33 has been  
93 predominantly connected with type 2 immune responses, we find that IL-33 signaling is required  
94 for limiting parasite burden in a heavily Th1-skewed environment. The mechanism outlined here  
95 may have relevance to human *T. gondii* infection and other neuropathological models featuring  
96 damage of IL-33-expressing glial cells.

97  
98

99 **RESULTS**

100

101 **Focal loss of IL-33-expressing glia is associated with replicating *T. gondii* in the**

102 **brain**

103 By four weeks post infection, *T. gondii* traffics to brain tissue of infected mice and exists  
104 in an intracellular cyst form which is slow growing<sup>3,34</sup>(Figure 1A). Cysts are most prominent in the  
105 cerebral cortex<sup>35</sup>, but can exist anywhere in the brain<sup>9,36-38</sup>, and each cyst can contain hundreds  
106 of individual parasites<sup>39</sup>. We observe occasional cyst reactivation in which releases fast-  
107 replicating parasites are released into brain tissue (Figure 1A). Clusters of cells surround  
108 individual replicating parasites but not *T. gondii* cysts (Figure 1A). Therefore, we hypothesized  
109 that local damage signals are released in response to lytic *T. gondii* replication<sup>40</sup> which could  
110 mediate cellular recruitment. We focused on one candidate alarmin, IL-33, which is highly  
111 expressed in the CNS at baseline<sup>23,26,27</sup>. Consistent with IL-33 being a pre-stored alarmin,  
112 expression only mildly increases with infection (Figure S1A). While IL-33 expression is spread  
113 evenly throughout the naïve brain<sup>26</sup>, we noticed focal loss of nuclear IL-33 staining in association  
114 with replicating parasite (Fig. 1B), suggesting potential alarmin release in these regions. In the *T.*  
115 *gondii* infected brain parenchyma, IL-33 is expressed by mature, CC1<sup>+</sup> mature oligodendrocytes  
116 and by astrocytes, the percentage of which varies by brain region (Figures 1C, 1D, 1E, and S1B).  
117 In gray matter, such as the cortex, 60% of IL-33 positive cells are oligodendrocytes and the  
118 remainder of the IL-33 expression is astrocytic (Figure 1E). But in white matter tracts such as the  
119 corpus callosum, nearly all of IL-33-expressing cells are oligodendrocytes (Figures 1D and 1E).  
120 Markers for these cell types are also absent at the center of inflammatory lesions, suggestive of  
121 glial cell death and possible local release of IL-33 in the *T. gondii*-infected brain parenchyma  
122 (Figure S1C).

123 We also detected IL-33 protein expression in astrocytes in healthy human brain tissue, but  
124 not in oligodendrocytes (Figures 1F and 1G). Innate recognition of *T. gondii* in the human brain

125 has not been described, due in part to the fact that TLRs 11 and 12 which recognize *T. gondii*  
126 acutely in mice are a pseudogene and nonexistent in humans, respectively<sup>2,15,16,41</sup>. In post-mortem  
127 brain tissue of a toxoplasmic encephalitis patient, we detected intact IL-33 staining in healthier  
128 regions of infected brain tissue, but IL-33 staining was absent from *T. gondii* lesions (Figure S1D).  
129 Collectively, these results indicate that IL-33 is expressed by glia in the *T. gondii* infected brain  
130 and is absent from lesions where *T. gondii* is replicating.

131

### 132 **IL-33-ST2 signaling induces localized monocyte chemoattractant, CCL2**

133 In order to interrogate the function of IL-33 in *T. gondii* infection, we considered its  
134 described role as an alarmin which recruits and activates immune cells<sup>19-21</sup>. Recruitment of  
135 immune cells to the brain is a highly-orchestrated process which requires upregulation of  
136 chemokine and adhesion factor expression. We probed whole brain homogenate by qRT-PCR  
137 from wildtype and IL-33R(ST2)-deficient mice for discrepancies in genes which could influence  
138 immune cell trafficking to the brain. ST2<sup>-/-</sup> mice exhibited defects in expression of the chemokines  
139 *ccl2*, *cxcl10*, and *cxcl1* compared with infected wildtype counterparts (Figure 2A), whereas  
140 expression of the adhesion factors *vcam* and *icam* were equivalent between genotypes (Figure  
141 2A). Interestingly, *ccl2* and *cxcl10* expression has been attributed to astrocytes by *in situ*  
142 hybridization during *T. gondii* infection<sup>42</sup>. Although *cxcl1* has not been extensively studied in our  
143 system, it has been reported to be expressed in astrocytes during neuroinflammation<sup>43</sup>. We did  
144 not observe an effect, however, of IL-33 signaling on *cxcl9* expression– a chemokine which is  
145 made by PU.1-expressing cells, including microglia and macrophages, rather than astrocytes<sup>44</sup>  
146 (Fig. 2A). These results suggest that IL-33 may be acting directly on astrocytes to induce  
147 chemokine expression during *T. gondii* infection.

148 We next sought to visualize the localization of chemokine expression in relation to parasite  
149 replication within brain tissue. We focused on the chemokine with the greatest in expression  
150 between WT and ST2<sup>-/-</sup> mice, the monocyte chemoattractant CCL2. CCL2 expression is highly

151 upregulated in the brain following infection by approximately 100-fold (Fig. S2A). To gain a spatial  
152 understanding of CCL2 expression, we infected CCL2-mCherry reporter mice<sup>45</sup> and conducted  
153 immunofluorescence microscopy on chronically infected brain tissue. We observed CCL2  
154 expression in “hotspots”, which were present in brain lesions containing hallmarks of parasite  
155 reactivation, including destruction of brain-resident cells, absence of IL-33 staining, and  
156 accumulation of immune cells (Figures 2B-2E). Approximately 75% of CCL2-mCherry was  
157 expressed by astrocytes and 22% by Iba1<sup>+</sup> macrophages, and 3% of cells did not co-stain with  
158 either of these markers (Figure S2B). CCL2-mCherry signal that could not be attributed to either  
159 cell type was present at the center of inflammatory lesions and could be derived from cellular  
160 debris or expressed by newly recruited monocytes which do not yet express the macrophage  
161 marker Iba1. Expression of CCL2 in inflammatory lesions led us to inquire whether CCL2 could  
162 be upregulated locally in response to IL-33. To this end, we crossed CCL2-mCherry reporter mice  
163 to ST2<sup>-/-</sup> mice to visualize CCL2 expression in the absence of IL-33 signaling. Sagittal brain  
164 section tile scans revealed that CCL2 foci in ST2<sup>-/-</sup> mice were much reduced in size compared  
165 with wildtype infected mice (Figures 2D and 2E). Multiple signals can likely induce CCL2 during  
166 infection, including other innate cytokines<sup>46</sup>, but our data suggest that IL-33 is a major contributor  
167 to the induction of focal CCL2 expression in the *T. gondii* infected brain (Figures 2D and 2E).

168

### 169 **Trafficking of blood-derived myeloid cells to the *T. gondii*-infected brain is** 170 **dependent on IL-33-ST2 signaling**

171 We next assessed the impact of IL-33-induced CCL2 expression on the recruitment of  
172 myeloid cells to the brain. Specifically, we were interested in the CCR2<sup>+</sup> monocyte subset and  
173 macrophages derived from these cells. To distinguish myeloid cell subsets that enter the brain  
174 from the brain-resident microglia, we generated a microglia reporter mouse strain by crossing a  
175 CX3CR1-creERT2 mouse to an Ai6 (ZsGreen) cre-reporter mouse. Mice were given tamoxifen at



176 weaning, labeling most myeloid cells, including microglia<sup>47,48</sup>. We waited four weeks post-  
177 tamoxifen treatment to allow for peripheral turnover of Zsgreen-expressing cells while microglia  
178 remained labeled. With these mice, we were able to visualize a robust increase in cell number of  
179 unlabeled (Zsgreen-), CD45<sup>hi</sup>, CD11b<sup>+</sup> infiltrating myeloid cells in the brain during chronic *T. gondii*  
180 infection (Figure 3A). Blood-derived macrophages were not only present in the brain during  
181 infection (Figure 3B), but also clustered with high fidelity around replicating parasite (Figure S3A),  
182 as distinguished from microglia in brain tissue sections using the microglia reporter mouse. While  
183 a small percentage of microglia upregulate CD45 upon infection, we found that over 90% of  
184 Zsgreen<sup>+</sup> microglia were captured by a CD45<sup>int</sup> gate by flow cytometry (Fig. S3B). Therefore, we  
185 used CD45 expression to distinguish microglia from infiltrating myeloid cells in future flow  
186 cytometry experiments.

187 Recruitment of myeloid cells to the *T. gondii*-infected brain was dependent on IL-33-ST2  
188 signaling. The frequency and number of engrafted myeloid cells denoted by CD45<sup>hi</sup> CD11b<sup>+</sup> cells  
189 were decreased in infected ST2<sup>-/-</sup> brains compared with controls by flow cytometry (Figures 3C  
190 and 3D), while CD45<sup>int</sup> CD11b<sup>+</sup> microglia numbers were unchanged (Figure 3D). Importantly, this  
191 phenomenon was brain-specific. ST2<sup>-/-</sup> spleens contained higher numbers of CD11b<sup>+</sup> cells than  
192 controls, which was not evident at baseline, supportive of a brain recruitment defect (Figures S3C,  
193 S3D). Numbers of myeloid cells were also comparable in ST2-deficient and wildtype mice during  
194 acute infection (Figure S3E and S3F). To confirm that myeloid cells recruited to the brain were  
195 monocyte-derived and capable of responding to CCL2, we crossed ST2<sup>-/-</sup> mice to a CCR2-RFP  
196 reporter mouse. At four weeks post infection, ST2<sup>-/-</sup> mice displayed a marked decrease in CCR2<sup>+</sup>  
197 cell infiltration (Figures 3E, 3F, and 3G) by immunohistochemistry.

198

### 199 **IL-33 signals on a radio-resistant responder to recruit myeloid cells to the brain**

200 Given that a wide range of cells have been reported to express ST2<sup>19,21,25</sup>, we were curious  
201 which ST2-expressing cell type was responsible for mediating IL-33-dependent recruitment of

202 myeloid cells to the brain. We detected ST2 on innate lymphoid cells (ILC2s) in the brain, as well  
203 as regulatory T cells (Tregs) (Figures S4A and S4B). But it is unclear if ILC2s would be relevant  
204 to monocyte recruitment during a Th1-dominated infection, and Tregs are spatially restricted from  
205 the parenchyma even after *T. gondii* infection<sup>31</sup>. ST2 mRNA has also been reported in microglia  
206 and astrocytes<sup>49</sup>. Therefore, we performed a bone marrow chimera to determine if IL-33 signals  
207 on a radio-sensitive or a radio-resistant cell type to recruit myeloid cells to the brain. Briefly, we  
208 lethally irradiated wildtype and ST2<sup>-/-</sup> mice, then reconstituted these mice with bone marrow from  
209 wildtype donors or ST2<sup>-/-</sup> donors, and allowed 6 weeks for reconstitution before infection (Figure  
210 3H). We found that ST2-deficient recipients which received wildtype bone marrow resembled  
211 ST2-deficient mice which received ST2-deficient bone marrow, suggesting that a hematopoietic  
212 source of ST2 is irrelevant for IL-33-mediated recruitment of infiltrating myeloid cells to the brain  
213 (Figure 3I). These results are consistent with our hypothesis that IL-33 acts directly on astrocytes  
214 to induce CCL2 expression and recruit monocyte-derived myeloid cells to the brain.

### 215 **IL-33-ST2 signaling is required for engrafted myeloid cell-derived iNOS expression**

216  
217 We next probed further into the blood-derived myeloid compartment to assess the anti-  
218 parasitic capacity of these cells in the absence of IL-33 signaling. One of the most powerful  
219 mechanisms myeloid cells can employ to limit parasite is the production of NO by inducible nitric  
220 oxide synthase (iNOS)<sup>2,13,14</sup>. We assessed which cells expressed iNOS in the brain by flow  
221 cytometry using the microglia reporter mouse. All of the iNOS in the infected brain can be  
222 attributed to CD11b<sup>+</sup> myeloid cells, only a tenth of which is produced by microglia (Figures 4A and  
223 4B). Peripherally-derived macrophages far outnumber microglia and the frequency of iNOS  
224 expressing cells within the microglia population was also much lower than that of infiltrating  
225 myeloid cells (Figure 4A).

226  
227 We found IL-33-ST2 signaling to be required for adequate iNOS expression by  
228 peripherally-derived macrophages (Figures 4C and 4D). Beyond a macrophage recruitment

229 defect, iNOS positive infiltrating myeloid cells were reduced in frequency (Figure 4C), suggesting  
230 that of the cells that reach the brain, fewer are anti-parasitic without IL-33 signaling. IL-33 is not  
231 likely to influence iNOS production in infiltrating macrophages directly, as we did not detect ST2  
232 in these cells (Figure S4C). Alternatively, we propose that IL-33-induced chemokine directs  
233 infiltrated macrophages to inflammatory lesions where local signals that can upregulate iNOS are  
234 concentrated. Indeed, iNOS expression by macrophages in the *T. gondii*-infected brain is  
235 localized in clusters, and the size of these foci are dependent on IL-33 signaling (Figures 4E and  
236 4F). One signal which is required for iNOS expression is IFN- $\gamma$ , which acts through STAT1<sup>1,2</sup>. We  
237 observe reduced foci of phosphorylated STAT1-positive macrophages in tissue sections in the  
238 absence of IL-33 signaling (Figure S4D). These results emphasize that not only are fewer  
239 macrophages recruited to the *T. gondii* infected brain in the absence of IL-33 signaling, but fewer  
240 are instructed by IFN- $\gamma$  to make iNOS within inflammatory lesions.

241

### 242 **ST2<sup>-/-</sup> mice have deficient CD4<sup>+</sup> T cell responses**

243 IFN- $\gamma$  is almost exclusively T cell-derived in the *T. gondii*-infected brain (Figure S5A). Reduced  
244 phosphorylated-STAT1 and IFN- $\gamma$ -inducible iNOS expression in inflammatory foci of infected  
245 ST2<sup>-/-</sup> mice pointed to a reduction in T cell-derived IFN- $\gamma$  near replicating parasites. T cells are  
246 indeed present in lesions containing replicating *T. gondii*, but cluster less densely than  
247 macrophages (Figure S5B). When we assessed T cell numbers by flow cytometry in ST2 deficient  
248 mice, we observed a decrease in CD4<sup>+</sup>, but not CD8<sup>+</sup> T cells (Figure 5A). CD4<sup>+</sup> T cells displayed  
249 reduced proliferation, *T. gondii*-tetramer specificity, and cytokine secretion in ST2<sup>-/-</sup> mice (Figures  
250 5B and 5C), whereas CD8<sup>+</sup> function was unaffected (Figures S5C and S5D). These results could  
251 potentially be explained by the decrease of MHCII-expressing cells in the brains of ST2<sup>-/-</sup> mice,  
252 which may provide less opportunity for local CD4<sup>+</sup> T cell activation (Figure 5D). Importantly, T cell  
253 responses were unaffected in the periphery and during the acute stage of infection in ST2<sup>-/-</sup> mice

254 (Figures S5E-G). These results highlight the compounding effect of ST2 deficiency in anti-  
255 parasitic capacity displayed by both myeloid cells and T cells during chronic *T. gondii* infection.

256

### 257 **IL-33-ST2 signaling is required for control of brain parasite burden**

258

259 The ultimate consequence of the absence of IL-33-ST2 signaling is an increase in brain

260 parasite burden (Figures 6A, 6B). Tissue cysts observed by H & E staining of infected brain tissue

261 were present in clusters in ST2<sup>-/-</sup> mice, a phenomenon which does not occur frequently in wildtype

262 mice (Figure 6A). We propose that in ST2<sup>-/-</sup> mice, parasite reactivation events are not properly

263 controlled, resulting in increased opportunity for parasite to encyst in neighboring cells.

264 Importantly, parasite was cleared from peripheral tissues in acute stages of infection in ST2-

265 deficient mice (data not shown). While parasite burden does increase, ST2<sup>-/-</sup> mice do not succumb

266 to infection, which implies that there are additional signals that mobilize and shape the protective

267 immune response to chronic *Toxoplasma gondii* infection. In any case, IL-33 plays a non-

268 redundant role and contributes significantly to the control of chronic *T. gondii* infection.

269

270

271 **DISCUSSION**

272

273 Instructing immune cells to enter the brain and reach particular sites within brain tissue  
274 requires fine-tuned orchestration<sup>50-52</sup>. Chemokines can impact behavior and interaction of immune  
275 cells within the brain parenchyma<sup>52</sup>, but the signals which precede chemokine production, in our  
276 system and in many others, are often not understood. Our results pinpoint a damage-associated  
277 cue, IL-33, which induces localized production of monocyte chemoattractant in the *T. gondii*-  
278 infected brain. IL-33 is necessary for the congregation of nitric-oxide-producing myeloid cells  
279 within the parenchyma and, consequently, is necessary to limit parasite burden.

280 There are several interesting aspects of IL-33 expression which lend themselves to further  
281 study. Each tissue in the body contains resident cells that detect perturbations and communicate  
282 to peripheral immune cells<sup>53</sup>. In both the naïve and *T. gondii*-infected adult brain parenchyma, IL-  
283 33 is not expressed by all brain-resident cells, but rather is restricted to myelinating  
284 oligodendrocytes and astrocytes. This is in stark contrast to HMGB1, which is expressed  
285 ubiquitously in the brain<sup>30</sup>. Common intracellular contents which can also signal damage, such as  
286 ATP and uric acid, are also housed in nearly all cell types. We find that the majority of IL-33  
287 expression in the infected, adult mouse brain is derived from oligodendrocytes, specifically,  
288 mature myelinating oligodendrocytes, implicating these cells as sentinels of tissue damage. IL-33  
289 expression by mature oligodendrocytes, rather than oligodendrocyte progenitors is consistent  
290 with the observation of IL-33 expression in terminally differentiated cells throughout the rest of the  
291 body, including barrier cells and cardiomyocytes<sup>20,54,55</sup>. Oligodendrocytes are uniquely susceptible  
292 to several initiators of cell death, including oxidative stress, sphingolipid-derived ceramide  
293 signaling, and glutamate excitotoxicity<sup>56</sup>. IL-33 may be involved in any brain insult associated with  
294 oligodendrocyte death, including even normal aging, where excitotoxicity to oligodendrocytes has  
295 been reported<sup>56,57</sup>.

296 We have identified IL-33 expression by astrocytes in the healthy human brain, but not by  
297 oligodendrocytes. Discrepancies by which brain cells release IL-33 between humans and mice is

298 of translational interest and is a topic for further study. We posit that IL-33 signaling has relevance  
299 to human *T. gondii* infection, as we documented a loss of IL-33 staining in regions of parasite  
300 deposition within the brain of a human toxoplasmic encephalitis patient. Recognition of damage  
301 caused by a pathogen may be a more broadly relevant mechanism for engendering an immune  
302 response than recognition of the pathogen itself through germline encoded receptors. Alarmin  
303 signaling would allow more species, including humans, to detect *Toxoplasma*, since the murine-  
304 specific TLRs 11 and 12 which recognize a *T. gondii* cytoskeletal protein are a pseudogene or  
305 nonexistent in humans, respectively<sup>15,16,41,58,59</sup>. IL-33 signaling could result in similar  
306 consequences as TLR signaling described in response to *T. gondii* in mice, since both pathways  
307 converge on MyD88 and NF- $\kappa$ B<sup>30</sup>.

308 We have established that IL-33 acts on a radio-resistant responder to recruit immune cells  
309 to the *T. gondii*-infected brain, although IL-33 has been most commonly reported to signal on  
310 immune cells in the periphery<sup>19-21,25</sup>. For reasons that are unclear, ST2 expression has not been  
311 convincingly shown on the protein level on any brain resident cell types, but IL-33 ST2 signaling  
312 on glia has been suggested in other studies focused on the CNS. In the retina, IL-33 is released  
313 from, and acts on, Müller cells in an autocrine fashion in response to phototoxic stress<sup>55</sup>. In the  
314 brain, ST2 mRNA has been detected in both astrocytes and microglia<sup>49</sup>. During brain  
315 development, specific deletion of ST2 in microglia led to disrupted synapse engulfment<sup>27</sup>. There  
316 is also a suggestion that the relevant ST2-bearing cell can rapidly change with insult. A prior study  
317 demonstrated that a CD11b<sup>+</sup> fraction from uninjured spinal cord was ST2 positive, whereas the  
318 majority of ST2 expression from contused spinal cord glia was CD11b-negative<sup>26</sup>. Indeed, we  
319 observe by RNA-seq that microglia express detectable ST2 at baseline, but expression decreases  
320 10-fold with infection (unpublished observations). The current study implicates astrocytes as a  
321 potential responder to IL-33 during infection. Therefore, our study and others support a glia-glia  
322 communication for IL-33 signaling in the CNS.

323           The most well-described function of IL-33 is the potentiation of type 2 immune responses,  
324 characterized by secretion of the cytokines IL-4, IL-5, and IL-13, and the involvement of type 2  
325 innate lymphoid cells and alternatively activated macrophages<sup>19-21,25</sup>. But the definition of IL-33  
326 signaling is broadening; IL-33 now has described roles for inducing a Th1-skewed immune  
327 response<sup>60,61</sup>, and roles in tissue homeostasis<sup>25</sup>. Our work furthers the idea that the outcome of  
328 IL-33 signaling is highly dependent on the inflammatory environment. We find that IL-33 plays a  
329 role in potentiating the type 1-skewed response necessary for controlling *T. gondii* in the brain.  
330 We demonstrate that IL-33 is required for myeloid cell-derived nitric oxide production in  
331 inflammatory lesions. It is unclear how IL-33 mediates this effect, since iNOS-positive cells in our  
332 system do not express ST2. We suggest that IL-33 recruits cells via astrocyte-derived chemokine  
333 to areas in the brain which contain signals to induce iNOS expression. One of these is likely IFN-  
334  $\gamma$ , but it is possible that other alarmins, or recognition of the parasite itself, could influence anti-  
335 parasitic capacity in inflammatory lesions. IL-33 signaling also did not seem to impact the brain  
336 vasculature, but other alarmins may activate the vasculature to promote monocyte cell entry,  
337 illustrating the complex process necessary for recruitment of cells to specific regions of the CNS.

338           Ultimately, our results demonstrate the importance of one alarmin in controlling a  
339 pathogen which infects the brain parenchyma. IL-33 signaling is required for local immune  
340 responses generated during *T. gondii* infection of the immunologically-unique CNS. Since ST2<sup>-/-</sup>  
341 mice do not succumb to infection, additional mechanisms are likely at play during chronic *T. gondii*  
342 infection, including signaling by other alarmins, such as ATP, HMGB1, S100 proteins, and IL-1 $\alpha$ .

343

344

345

346

347 **ACKNOWLEDGEMENTS**

348 The authors would like to acknowledge members of the Harris lab and center for Brain  
349 Immunology and Glia (BIG) for their valuable input during the development of this work. We thank  
350 Sachin P. Gadani and Kenneth S. Tung for the discussions regarding IL-33. We thank Marieke K.  
351 Jones for her guidance with statistical analysis and coding. We would like to acknowledge the  
352 support we received from core facilities at the University of Virginia, including the Biorepository  
353 and Tissue Research Facility, the Flow Cytometry Core, and the Research Histology Core.  
354



355 **CONTRIBUTIONS**

356 Conceptualization, K. M. S. and T. H. H.; Investigation, K. M. S., S. J. B., J. A. T., N. W.  
357 H., and C. A. O.; Writing—Original Draft, K. M. S.; Writing—Reviewing and Editing, K. M.  
358 S., S. J. B., N. W. H., C. A. O., and T. H. H.; Funding Acquisition, T. H. H.; Supervision,  
359 T. H. H.

360 **DECLARATION OF INTERESTS**

361 The authors declare no competing interests.

## 362 REFERENCES

- 363 1 Hunter, C. A. & Sibley, L. D. Modulation of innate immunity by *Toxoplasma gondii* virulence  
364 effectors. *Nat Rev Microbiol* **10**, 766-778, doi:10.1038/nrmicro2858 (2012).
- 365 2 Yarovinsky, F. Innate immunity to *Toxoplasma gondii* infection. *Nat Rev Immunol* **14**, 109-  
366 121, doi:10.1038/nri3598 (2014).
- 367 3 Dubey, J. P., Lindsay, D. S. & Speer, C. A. Structures of *Toxoplasma gondii* tachyzoites,  
368 bradyzoites, and sporozoites and biology and development of tissue cysts. *Clin Microbiol*  
369 *Rev* **11**, 267-299 (1998).
- 370 4 Slavin, M. A., Meyers, J. D., Remington, J. S. & Hackman, R. C. *Toxoplasma gondii*  
371 infection in marrow transplant recipients: a 20 year experience. *Bone Marrow Transplant*  
372 **13**, 549-557 (1994).
- 373 5 Luft, B. J. & Remington, J. S. Toxoplasmic encephalitis in AIDS. *Clin Infect Dis* **15**, 211-  
374 222 (1992).
- 375 6 Luft, B. J. & Remington, J. S. AIDS commentary. Toxoplasmic encephalitis. *J Infect Dis*  
376 **157**, 1-6 (1988).
- 377 7 Hunter, C. A. & Remington, J. S. Immunopathogenesis of toxoplasmic encephalitis. *J*  
378 *Infect Dis* **170**, 1057-1067 (1994).
- 379 8 Frenkel, J. K. Congenital toxoplasmosis: prevention or palliation? *Am J Obstet Gynecol*  
380 **141**, 359-361 (1981).
- 381 9 Ferguson, D. J., Graham, D. I. & Hutchison, W. M. Pathological changes in the brains of  
382 mice infected with *Toxoplasma gondii*: a histological, immunocytochemical and  
383 ultrastructural study. *Int J Exp Pathol* **72**, 463-474 (1991).
- 384 10 Waree, P., Ferguson, D. J., Pongponratn, E., Chaisri, U. & Sukthana, Y.  
385 Immunohistochemical study of acute and chronic toxoplasmosis in experimentally infected  
386 mice. *Southeast Asian J Trop Med Public Health* **38**, 223-231 (2007).
- 387 11 Gazzinelli, R., Xu, Y., Hieny, S., Cheever, A. & Sher, A. Simultaneous depletion of CD4+  
388 and CD8+ T lymphocytes is required to reactivate chronic infection with *Toxoplasma*  
389 *gondii*. *J Immunol* **149**, 175-180 (1992).
- 390 12 Fox, B. A., Gigley, J. P. & Bzik, D. J. *Toxoplasma gondii* lacks the enzymes required for  
391 de novo arginine biosynthesis and arginine starvation triggers cyst formation. *Int J*  
392 *Parasitol* **34**, 323-331, doi:10.1016/j.ijpara.2003.12.001 (2004).
- 393 13 Scharon-Kersten, T. M., Yap, G., Magram, J. & Sher, A. Inducible nitric oxide is essential  
394 for host control of persistent but not acute infection with the intracellular pathogen  
395 *Toxoplasma gondii*. *J Exp Med* **185**, 1261-1273 (1997).
- 396 14 Schluter, D. *et al.* Inhibition of inducible nitric oxide synthase exacerbates chronic cerebral  
397 toxoplasmosis in *Toxoplasma gondii*-susceptible C57BL/6 mice but does not reactivate  
398 the latent disease in T. *gondii*-resistant BALB/c mice. *J Immunol* **162**, 3512-3518 (1999).
- 399 15 Yarovinsky, F. *et al.* TLR11 activation of dendritic cells by a protozoan profilin-like protein.  
400 *Science* **308**, 1626-1629, doi:10.1126/science.1109893 (2005).
- 401 16 Koblansky, A. A. *et al.* Recognition of profilin by Toll-like receptor 12 is critical for host  
402 resistance to *Toxoplasma gondii*. *Immunity* **38**, 119-130,  
403 doi:10.1016/j.immuni.2012.09.016 (2013).
- 404 17 Gofu, G. *et al.* Dual role for inflammasome sensors NLRP1 and NLRP3 in murine  
405 resistance to *Toxoplasma gondii*. *MBio* **5**, doi:10.1128/mBio.01117-13 (2014).
- 406 18 Ewald, S. E., Chavarria-Smith, J. & Boothroyd, J. C. NLRP1 is an inflammasome sensor  
407 for *Toxoplasma gondii*. *Infect Immun* **82**, 460-468, doi:10.1128/IAI.01170-13 (2014).
- 408 19 Martin, N. T. & Martin, M. U. Interleukin 33 is a guardian of barriers and a local alarmin.  
409 *Nat Immunol* **17**, 122-131, doi:10.1038/ni.3370 (2016).
- 410 20 Liew, F. Y., Girard, J. P. & Turnquist, H. R. Interleukin-33 in health and disease. *Nat Rev*  
411 *Immunol* **16**, 676-689, doi:10.1038/nri.2016.95 (2016).

- 412 21 Liew, F. Y., Pitman, N. I. & McInnes, I. B. Disease-associated functions of IL-33: the new  
413 kid in the IL-1 family. *Nat Rev Immunol* **10**, 103-110, doi:10.1038/nri2692 (2010).
- 414 22 Jones, L. A. *et al.* IL-33 receptor (T1/ST2) signalling is necessary to prevent the  
415 development of encephalitis in mice infected with *Toxoplasma gondii*. *Eur J Immunol* **40**,  
416 426-436, doi:10.1002/eji.200939705 (2010).
- 417 23 Schmitz, J. *et al.* IL-33, an interleukin-1-like cytokine that signals via the IL-1 receptor-  
418 related protein ST2 and induces T helper type 2-associated cytokines. *Immunity* **23**, 479-  
419 490, doi:10.1016/j.immuni.2005.09.015 (2005).
- 420 24 Cayrol, C. & Girard, J. P. The IL-1-like cytokine IL-33 is inactivated after maturation by  
421 caspase-1. *Proc Natl Acad Sci U S A* **106**, 9021-9026, doi:10.1073/pnas.0812690106  
422 (2009).
- 423 25 Molofsky, A. B., Savage, A. K. & Locksley, R. M. Interleukin-33 in Tissue Homeostasis,  
424 Injury, and Inflammation. *Immunity* **42**, 1005-1019, doi:10.1016/j.immuni.2015.06.006  
425 (2015).
- 426 26 Gadani, S. P., Walsh, J. T., Smirnov, I., Zheng, J. & Kipnis, J. The glia-derived alarmin IL-  
427 33 orchestrates the immune response and promotes recovery following CNS injury.  
428 *Neuron* **85**, 703-709, doi:10.1016/j.neuron.2015.01.013 (2015).
- 429 27 Vainchtein, I. D. *et al.* Astrocyte-derived interleukin-33 promotes microglial synapse  
430 engulfment and neural circuit development. *Science* **359**, 1269-1273,  
431 doi:10.1126/science.aal3589 (2018).
- 432 28 Louveau, A., Harris, T. H. & Kipnis, J. Revisiting the Mechanisms of CNS Immune  
433 Privilege. *Trends Immunol* **36**, 569-577, doi:10.1016/j.it.2015.08.006 (2015).
- 434 29 Gadani, S. P., Smirnov, I., Smith, A. T., Overall, C. C. & Kipnis, J. Characterization of  
435 meningeal type 2 innate lymphocytes and their response to CNS injury. *J Exp Med* **214**,  
436 285-296, doi:10.1084/jem.20161982 (2017).
- 437 30 Gadani, S. P., Walsh, J. T., Lukens, J. R. & Kipnis, J. Dealing with Danger in the CNS:  
438 The Response of the Immune System to Injury. *Neuron* **87**, 47-62,  
439 doi:10.1016/j.neuron.2015.05.019 (2015).
- 440 31 O'Brien, C. A. *et al.* CD11c-Expressing Cells Affect Regulatory T Cell Behavior in the  
441 Meninges during Central Nervous System Infection. *J Immunol* **198**, 4054-4061,  
442 doi:10.4049/jimmunol.1601581 (2017).
- 443 32 Fu, A. K. *et al.* IL-33 ameliorates Alzheimer's disease-like pathology and cognitive decline.  
444 *Proc Natl Acad Sci U S A* **113**, E2705-2713, doi:10.1073/pnas.1604032113 (2016).
- 445 33 Luo, H., Higuchi, K., Matsumoto, K. & Mori, M. An interleukin-33 gene polymorphism is a  
446 modifier for eosinophilia in rats. *Genes Immun* **14**, 192-197, doi:10.1038/gene.2013.7  
447 (2013).
- 448 34 Saeij, J. P., Boyle, J. P., Grigg, M. E., Arrizabalaga, G. & Boothroyd, J. C. Bioluminescence  
449 imaging of *Toxoplasma gondii* infection in living mice reveals dramatic differences  
450 between strains. *Infect Immun* **73**, 695-702, doi:10.1128/IAI.73.2.695-702.2005 (2005).
- 451 35 Cabral, C. M. *et al.* Neurons are the Primary Target Cell for the Brain-Tropic Intracellular  
452 Parasite *Toxoplasma gondii*. *PLoS Pathog* **12**, e1005447,  
453 doi:10.1371/journal.ppat.1005447 (2016).
- 454 36 Di Cristina, M. *et al.* Temporal and spatial distribution of *Toxoplasma gondii* differentiation  
455 into Bradyzoites and tissue cyst formation in vivo. *Infect Immun* **76**, 3491-3501,  
456 doi:10.1128/IAI.00254-08 (2008).
- 457 37 Kittas, S., Kittas, C., Paizi-Biza, P. & Henry, L. A histological and immunohistochemical  
458 study of the changes induced in the brains of white mice by infection with *Toxoplasma*  
459 *gondii*. *Br J Exp Pathol* **65**, 67-74 (1984).
- 460 38 Berenreiterova, M., Flegr, J., Kubena, A. A. & Nemeč, P. The distribution of *Toxoplasma*  
461 *gondii* cysts in the brain of a mouse with latent toxoplasmosis: implications for the

- 462 behavioral manipulation hypothesis. *PLoS One* **6**, e28925,  
463 doi:10.1371/journal.pone.0028925 (2011).
- 464 39 Hill, D. E., Chirukandoth, S. & Dubey, J. P. Biology and epidemiology of *Toxoplasma*  
465 *gondii* in man and animals. *Anim Health Res Rev* **6**, 41-61 (2005).
- 466 40 Black, M. W. & Boothroyd, J. C. Lytic cycle of *Toxoplasma gondii*. *Microbiol Mol Biol Rev*  
467 **64**, 607-623 (2000).
- 468 41 Roach, J. C. *et al.* The evolution of vertebrate Toll-like receptors. *Proc Natl Acad Sci U S*  
469 *A* **102**, 9577-9582, doi:10.1073/pnas.0502272102 (2005).
- 470 42 Strack, A., Asensio, V. C., Campbell, I. L., Schluter, D. & Deckert, M. Chemokines are  
471 differentially expressed by astrocytes, microglia and inflammatory leukocytes in  
472 *Toxoplasma encephalitis* and critically regulated by interferon-gamma. *Acta Neuropathol*  
473 **103**, 458-468, doi:10.1007/s00401-001-0491-7 (2002).
- 474 43 Kang, Z. *et al.* Act1 mediates IL-17-induced EAE pathogenesis selectively in NG2+ glial  
475 cells. *Nat Neurosci* **16**, 1401-1408, doi:10.1038/nn.3505 (2013).
- 476 44 Ellis, S. L. *et al.* The cell-specific induction of CXC chemokine ligand 9 mediated by IFN-  
477 gamma in microglia of the central nervous system is determined by the myeloid  
478 transcription factor PU.1. *J Immunol* **185**, 1864-1877, doi:10.4049/jimmunol.1000900  
479 (2010).
- 480 45 Shi, C. *et al.* Bone marrow mesenchymal stem and progenitor cells induce monocyte  
481 emigration in response to circulating toll-like receptor ligands. *Immunity* **34**, 590-601,  
482 doi:10.1016/j.immuni.2011.02.016 (2011).
- 483 46 Shi, C. & Pamer, E. G. Monocyte recruitment during infection and inflammation. *Nat Rev*  
484 *Immunol* **11**, 762-774, doi:10.1038/nri3070 (2011).
- 485 47 Yona, S. *et al.* Fate mapping reveals origins and dynamics of monocytes and tissue  
486 macrophages under homeostasis. *Immunity* **38**, 79-91, doi:10.1016/j.immuni.2012.12.001  
487 (2013).
- 488 48 Madisen, L. *et al.* A robust and high-throughput Cre reporting and characterization system  
489 for the whole mouse brain. *Nat Neurosci* **13**, 133-140, doi:10.1038/nn.2467 (2010).
- 490 49 Yasuoka, S. *et al.* Production and functions of IL-33 in the central nervous system. *Brain*  
491 *Res* **1385**, 8-17, doi:10.1016/j.brainres.2011.02.045 (2011).
- 492 50 Sa, Q. *et al.* VCAM-1/alpha4beta1 integrin interaction is crucial for prompt recruitment of  
493 immune T cells into the brain during the early stage of reactivation of chronic infection with  
494 *Toxoplasma gondii* to prevent toxoplasmic encephalitis. *Infect Immun* **82**, 2826-2839,  
495 doi:10.1128/IAI.01494-13 (2014).
- 496 51 Wilson, E. H., Weninger, W. & Hunter, C. A. Trafficking of immune cells in the central  
497 nervous system. *J Clin Invest* **120**, 1368-1379, doi:10.1172/JCI41911 (2010).
- 498 52 Harris, T. H. *et al.* Generalized Levy walks and the role of chemokines in migration of  
499 effector CD8+ T cells. *Nature* **486**, 545-548, doi:10.1038/nature11098 (2012).
- 500 53 von Moltke, J. & Pepper, M. Sentinels of the Type 2 Immune Response. *Trends Immunol*  
501 **39**, 99-111, doi:10.1016/j.it.2017.10.004 (2018).
- 502 54 Chen, W. Y., Hong, J., Gannon, J., Kakkar, R. & Lee, R. T. Myocardial pressure overload  
503 induces systemic inflammation through endothelial cell IL-33. *Proc Natl Acad Sci U S A*  
504 **112**, 7249-7254, doi:10.1073/pnas.1424236112 (2015).
- 505 55 Xi, H. *et al.* IL-33 amplifies an innate immune response in the degenerating retina. *J Exp*  
506 *Med* **213**, 189-207, doi:10.1084/jem.20150894 (2016).
- 507 56 McTigue, D. M. & Tripathi, R. B. The life, death, and replacement of oligodendrocytes in  
508 the adult CNS. *J Neurochem* **107**, 1-19, doi:10.1111/j.1471-4159.2008.05570.x (2008).
- 509 57 Mattson, M. P. Excitotoxic and excitoprotective mechanisms: abundant targets for the  
510 prevention and treatment of neurodegenerative disorders. *Neuromolecular Med* **3**, 65-94,  
511 doi:10.1385/NMM:3:2:65 (2003).

- 512 58 Andrade, W. A. *et al.* Combined action of nucleic acid-sensing Toll-like receptors and  
513 TLR11/TLR12 heterodimers imparts resistance to *Toxoplasma gondii* in mice. *Cell Host*  
514 *Microbe* **13**, 42-53, doi:10.1016/j.chom.2012.12.003 (2013).
- 515 59 Gazzinelli, R. T., Mendonca-Neto, R., Lilue, J., Howard, J. & Sher, A. Innate resistance  
516 against *Toxoplasma gondii*: an evolutionary tale of mice, cats, and men. *Cell Host Microbe*  
517 **15**, 132-138, doi:10.1016/j.chom.2014.01.004 (2014).
- 518 60 Baumann, C. *et al.* T-bet- and STAT4-dependent IL-33 receptor expression directly  
519 promotes antiviral Th1 cell responses. *Proc Natl Acad Sci U S A* **112**, 4056-4061,  
520 doi:10.1073/pnas.1418549112 (2015).
- 521 61 Bonilla, W. V. *et al.* The alarmin interleukin-33 drives protective antiviral CD8(+) T cell  
522 responses. *Science* **335**, 984-989, doi:10.1126/science.1215418 (2012).  
523
- 524

525 **FIGURES**

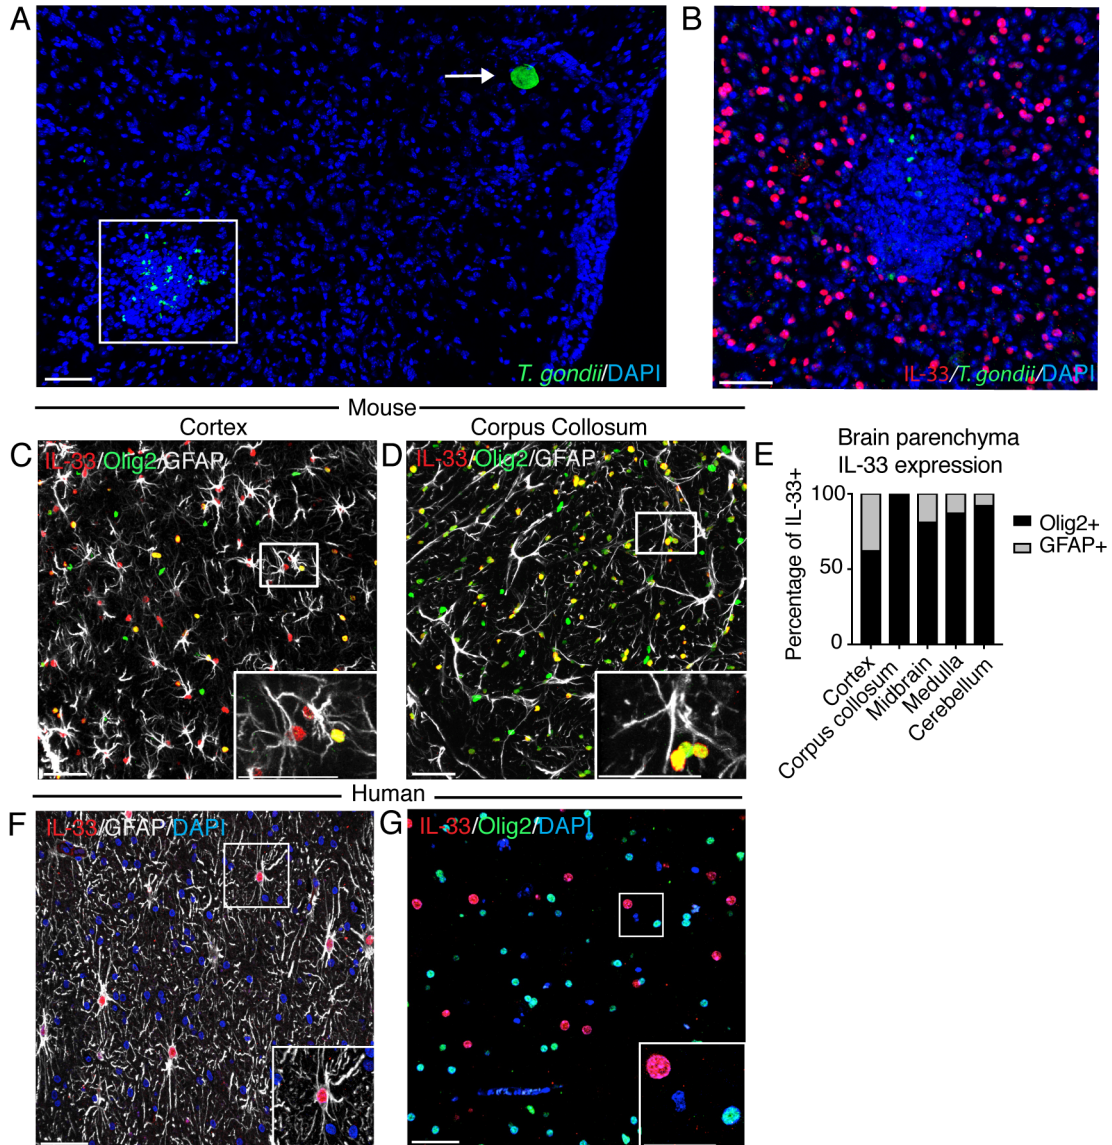

526

527 **Figure 1. Focal loss of IL-33 is associated with replicating *T. gondii* in the brain**

528 (A) Immunofluorescence staining of chronically infected mouse cortex for *T. gondii* (green) -

529 detected in cyst form (arrow) and its reactivated replicating form (box), DAPI staining was used

530 to detect nuclei (blue)

531 (B) Immunofluorescence staining of an inflammatory lesion for IL-33 (red) and *T. gondii* (green)

532 in chronically infected mouse brain tissue – DAPI staining was used to detect nuclei (blue)

533 (C-D) Representative brain region immunofluorescence staining for IL-33 (red), Olig2<sup>+</sup>  
534 oligodendrocytes (green), and GFAP<sup>+</sup> astrocytes (white) in chronically infected mouse gray matter  
535 (cortex) (C) and white matter (corpus collosum) (D)  
536 (E) Percentage of IL-33<sup>+</sup> cells which are Olig2<sup>+</sup> oligodendrocytes or GFAP<sup>+</sup> astrocytes by brain  
537 region, n=>30 cells per brain region, representative of 2 independent experiments  
538 (F-G) Immunofluorescence staining of healthy human temporal lobe brain tissue for IL-33 (red),  
539 colocalized with GFAP<sup>+</sup> astrocytes (white) (F), and not co-localized with Olig2<sup>+</sup> oligodendrocytes  
540 (green) (G), (n=3), scale bars = 50µm  
541 See also Figure S1



542  
543

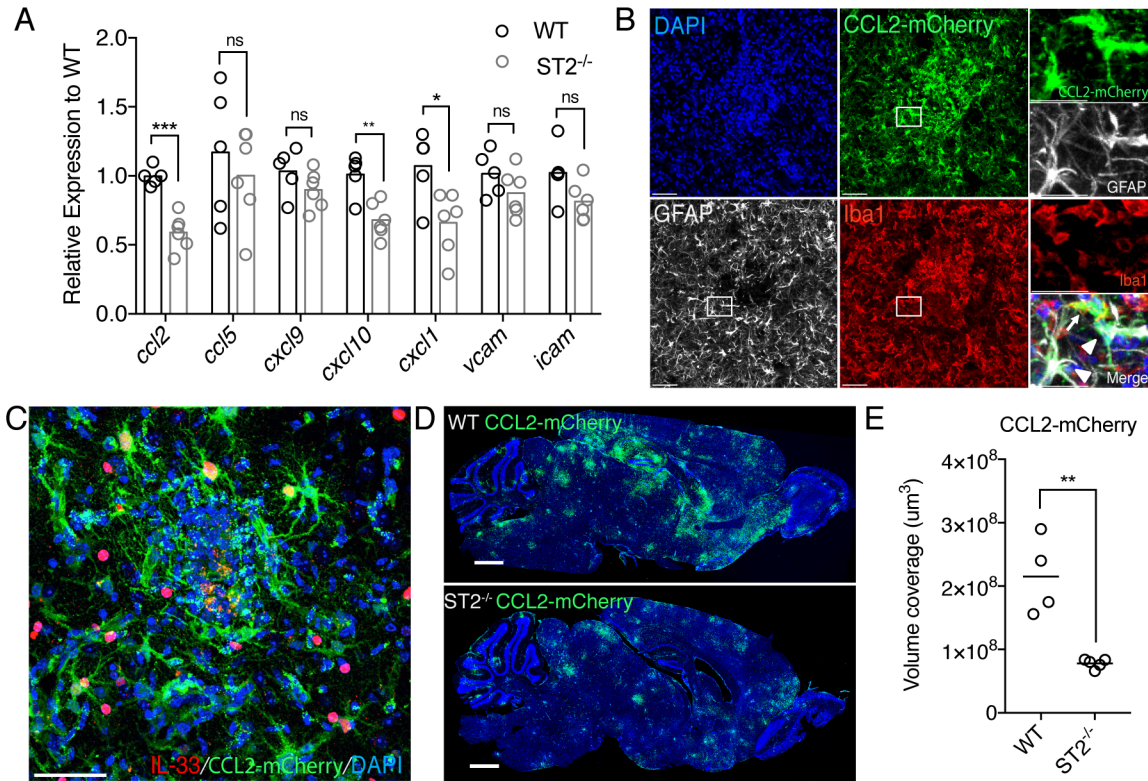

544

545 **Figure 2. IL-33-ST2 signaling induces localized monocyte chemoattractant, CCL2**

546 (A) Quantitative real time PCR was performed on RNA isolated from whole brain homogenate of  
547 chronically infected wildtype and ST2<sup>-/-</sup> mice, (n=5-6 per group, Student's t-test)

548 (B) Immunofluorescence staining of an inflammatory lesion in chronically infected CCL2-mCherry  
549 reporter brain tissue for mCherry (green), GFAP<sup>+</sup> astrocytes (white), and Iba1<sup>+</sup> macrophages (red)  
550 – DAPI staining was used to detect nuclei (blue), scale bar = 50μm. Insets depict co-stained  
551 CCL2-mCherry with GFAP<sup>+</sup> astrocytes and an Iba1<sup>+</sup> macrophage, scale bar = 20μm

552 (C) Immunofluorescence staining of an inflammatory lesion in chronically infected mouse brain  
553 tissue for IL-33 (red) and mCherry (green) – DAPI was used to detect nuclei (blue), scale bar =  
554 50μm

555 (D) Representative tile scans of chronically infected wildtype and ST2<sup>-/-</sup> CCL2-mCherry reporter  
556 mice. Sagittal brain slices were stained for mCherry and DAPI staining was used to detect nuclei  
557 (blue), scale bar = 2000  $\mu$ m

558 (E) Quantification of (D) by volume coverage of CCL2-mCherry voxels in sagittal brain sections  
559 using Imaris software, (n=4-5 per group, Student's t-test, data points are representative of 3  
560 averaged brain sections per mouse, overall data is representative of 3 independent experiments)

561 ns=p>0.05, \*=p<0.05, \*\*=p<0.01, \*\*\*=p<0.001

562 See also Figure S2.

563

564

565

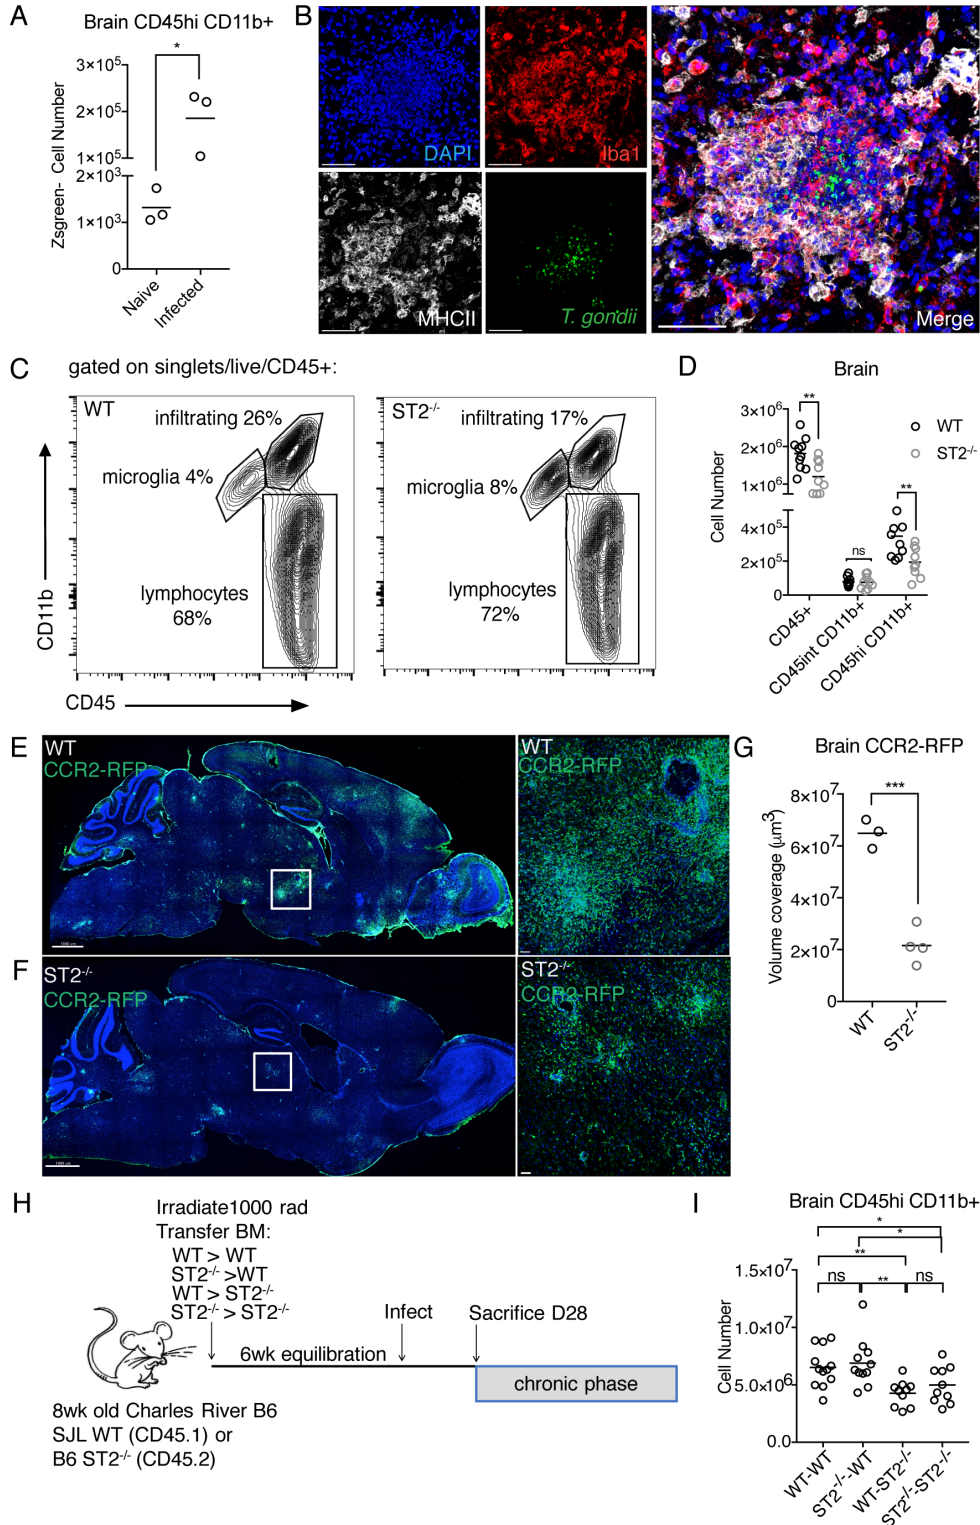

566

567 **Figure 3. Trafficking of blood-derived myeloid cells to the *T. gondii*-infected brain is**

568 **dependent on ST2 signaling on a radio-resistant responder**

569 (A) Flow cytometry staining of brain mononuclear cells from naïve and chronically infected  
570 CX3CR1creERT2 Zsgreen microglia reporter mice. Zsgreen<sup>-</sup> CD45<sup>hi</sup>, CD11b<sup>+</sup> (infiltrating myeloid)  
571 cell number was measured before and after infection, (n=3, Student's t-test, representative of 2  
572 independent experiments)

573 (B) Immunofluorescence staining of an inflammatory focus in chronically infected wildtype mouse  
574 brain tissue for Iba1<sup>+</sup> macrophages (red), MHCII<sup>+</sup> cells (white), and *T. gondii* (green) – DAPI was  
575 used to detect nuclei (blue), scale bar = 50µm

576 (C) Representative flow cytometry plots measuring CD45 and CD11b expression in chronically  
577 infected wildtype and ST2<sup>-/-</sup> brains

578 (D) Flow cytometry measurement of total CD45<sup>+</sup> immune cell number, CD45<sup>int</sup> CD11b<sup>+</sup> microglia  
579 number, and CD45<sup>hi</sup> CD11b<sup>+</sup> infiltrating myeloid number in chronically infected WT and ST2<sup>-/-</sup>  
580 brains, (n=3-4 per group, data was pooled from 3 experiments and analyzed by randomized block  
581 ANOVA).

582 (E-F) Representative tile scans of chronically infected wildtype and ST2<sup>-/-</sup> CCR2-RFP reporter  
583 mice. Sagittal brain slices were stained for RFP and DAPI staining was used to detect nuclei  
584 (blue), scale bar = 2000 µm, inset scale bar = 50µm

585 (G) Quantification of (E and F) by volume coverage of CCR2-RFP in sagittal brain sections using  
586 Imaris software, (n=3-4 per group, Student's t-test. Data points are representative of 3 averaged  
587 brain sections per mouse, performed once)

588 (H) Bone marrow chimera schematic – wildtype and ST2<sup>-/-</sup> mice were lethally irradiated and  
589 reconstituted with either wildtype or ST2<sup>-/-</sup> bone marrow. Mice were given six weeks for bone  
590 marrow to reconstitute prior to infection. Mice were sacrificed at 28 dpi and infiltrating myeloid cell  
591 numbers were assessed by flow cytometry.

592 (I) Flow cytometry measurement of CD45<sup>hi</sup> CD11b<sup>+</sup> infiltrating myeloid number in chronically  
593 infected chimera groups (n=5-6 per group, data was pooled from 2 experiments to demonstrate  
594 variability by infection and analyzed by randomized block ANOVA)

595 ns= $p > 0.05$ , \*= $p < 0.05$ , \*\*= $p < 0.01$ , \*\*\*= $p < 0.001$

596 See also Figure S3.

597

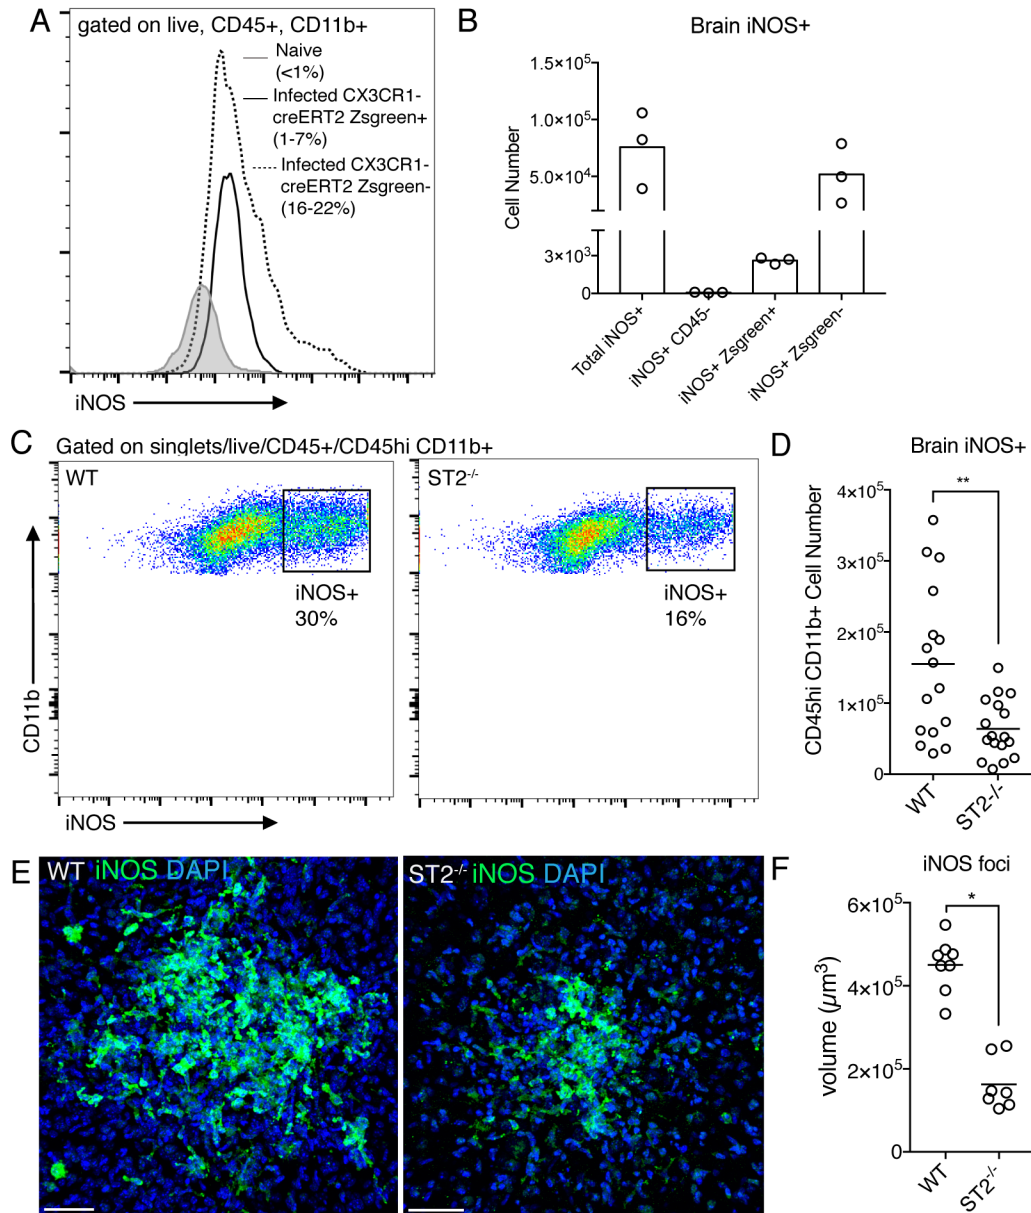

598

599 **Figure 4. IL-33-ST2 signaling is required for engrafted myeloid cell-derived iNOS**

600 (A) Representative flow cytometry histogram demonstrating iNOS expression in naïve and  
601 chronically infected CX3CR1-creERT2 ZsGreen microglia reporter mice. Microglia are ZsGreen<sup>+</sup>  
602 and brain-infiltrating CD45<sup>hi</sup> CD11b<sup>+</sup> cells are ZsGreen-negative. (n=3, representative of 2  
603 independent experiments)

604 (B) Flow cytometry measurement of iNOS<sup>+</sup> cells in brains of chronically infected CX3CR1-  
605 creERT2 ZsGreen microglia reporter mice. ZsGreen<sup>-</sup> cells are CD45<sup>hi</sup> CD11b<sup>+</sup> myeloid cells. (n=3,  
606 representative of 2 independent experiments).

607 (C) Representative flow cytometry dot plots measuring iNOS<sup>+</sup> frequency of CD45<sup>hi</sup> CD11b<sup>+</sup> brain-  
608 infiltrating cells in chronically infected wildtype and ST2<sup>-/-</sup> mice

609 (D) Flow cytometry measurement of brain infiltrating CD45<sup>hi</sup> CD11b<sup>+</sup> iNOS<sup>+</sup> cell number in  
610 chronically infected wildtype and ST2<sup>-/-</sup> mice (n=3-4 per group, data was pooled from 5  
611 experiments and analyzed by randomized block ANOVA)

612 (E) Representative immunofluorescence staining in brain inflammatory foci for iNOS (green)  
613 between wildtype and ST2<sup>-/-</sup> mice, DAPI was used to detect nuclei (blue), scale bar = 50µm

614 (F) Quantification of (E) by iNOS foci voxels in sagittal brain sections of wildtype and ST2<sup>-/-</sup>  
615 infected mice using Imaris software, (n=4-5 per group, each data point represents an average of  
616 3 sagittal sections, data was pooled from 2 experiments and analyzed by randomized block  
617 ANOVA) ns=p>0.05, \*=p<0.05, \*\*=p<0.01, \*\*\*=p<0.001

618 See also Figure S4.

619

620

621

622

623

624

625

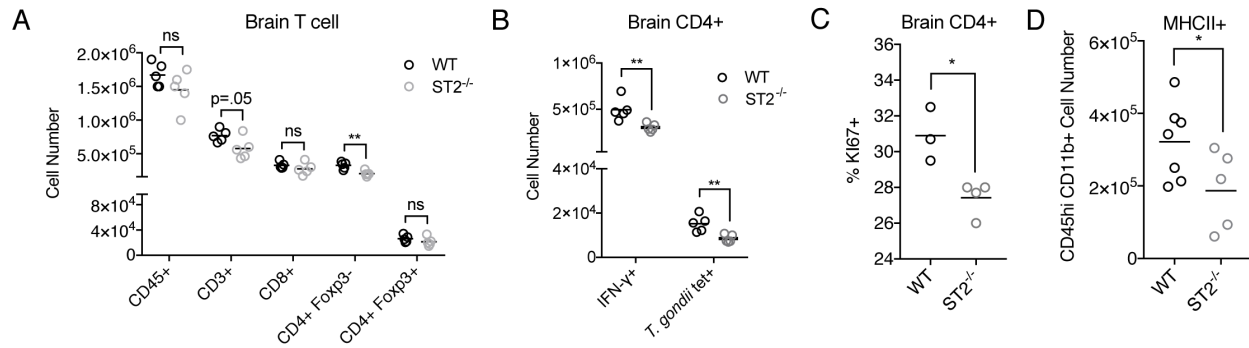

626

627 **Figure 5. ST2<sup>-/-</sup> mice have deficient CD4<sup>+</sup> T cell responses**

628 (A) Flow cytometry measurement of T cell subsets, including total CD45<sup>+</sup> immune cells, total CD3<sup>+</sup>  
629 T cells, CD8<sup>+</sup> T cells, CD4<sup>+</sup> Foxp3<sup>-</sup> effectors, and CD4<sup>+</sup> Foxp3<sup>+</sup> regulatory T cells from chronically  
630 infected wildtype and ST2<sup>-/-</sup> brains (n=5 per group, Student's t-test, representative of 5  
631 independent experiments)

632 (B) Flow cytometry measurement of activated CD4<sup>+</sup> T cells which were producing IFN-γ or were  
633 specific for a *T. gondii*-MHCII tetramer from chronically infected mice. Wildtype and ST2<sup>-/-</sup> brain  
634 mononuclear cells were stimulated with PMA/ionomycin for 5h (n=5 per group, Student's t-test,  
635 representative of 5 independent experiments)

636 (C) Flow cytometry measurement of Ki67<sup>+</sup> frequency of brain CD4<sup>+</sup> T cells from chronically  
637 infected wildtype and ST2<sup>-/-</sup> mice (n=3-4 mice per group, Student's t-test, performed once)

638 (D) Flow cytometry measurement of brain-infiltrating CD45<sup>hi</sup> CD11b<sup>+</sup> MHCII<sup>+</sup> myeloid cell number  
639 in chronically infected wildtype and ST2<sup>-/-</sup> brains (n=3-4 per group, data was pooled from 2  
640 experiments and analyzed by randomized block ANOVA)

641 ns=p>0.05, \*=p<0.05, \*\*=p<0.01, \*\*\*=p<0.001

642 See also Figure S5.

643

644

645

646

647



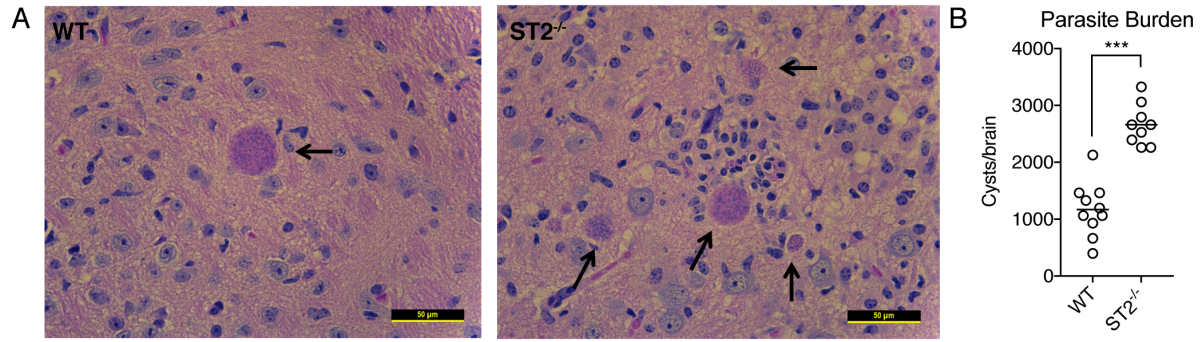

648

649 **Figure 6. IL-33-ST2 signaling is required for control of brain parasite burden**

650 (A) Hematoxylin and eosin staining of chronically infected brain tissue of wildtype and ST2<sup>-/-</sup> mice,  
651 arrows denote cysts, scale bar = 50μm

652 (B) Quantification of parasite burden by brain homogenate counts (n=3-4 per group, data was  
653 pooled from 3 experiments and analyzed by randomized block ANOVA) ns=p>0.05, \*=p<0.05,  
654 \*\*=p<0.01, \*\*\*=p<0.001

655

656 **METHODS**

657

658 **Contact for reagent and resource sharing**

659 Further information and requests for resources and reagents should be directed to and will be  
660 fulfilled by the Lead Contact, Tajie Harris ([tajieharris@virginia.edu](mailto:tajieharris@virginia.edu)).

661

662 **Experimental model and subject details**

663 C57BL/6, CCL2-RFP<sup>fllox</sup>, CCR2<sup>RFP</sup>, Ai6, and CX3CR1-CreERT2 mice were purchased from  
664 Jackson Laboratories. B6.SJL-Ptprc<sup>a</sup> Pepc<sup>b</sup>/BoyCrCl (C57BL/6 Ly5.1) mice were purchased from  
665 Charles River. ST2<sup>-/-</sup> mice were generously provided by Andrew McKenzie (Cambridge  
666 University). Ordering information for all strains is listed in the key resources table. Animals were  
667 housed in a UVA specific pathogen-free facility with a 12h light/dark cycle. Mice were age and  
668 sex matched for each experiment and were sacrificed in parallel. Animals were infected with *T.*  
669 *gondii* at 7 to 9 weeks of age and were housed separately from breeding animals. All procedures  
670 adhered to regulations of the Institutional Animal Care and Use Committee (ACUC) at the  
671 University of Virginia.

672

673 **Human Brain tissue**

674 Healthy and toxoplasmic encephalitis human brain samples from adult patients were obtained  
675 from the UVA Human Biorepository and Tissue Research Facility. Samples were preserved on  
676 paraffin embedded slides. Patient identification and medical background were withheld and  
677 therefore IRB approval was not required.

678

679 **Parasite Strains**

680 The avirulent, type II *Toxoplasma gondii* strain Me49 was used for all infections. *T. gondii* cysts  
681 were maintained in chronically infected (1-6 months) Swiss Webster (Charles River) mice. To  
682 generate cysts for experimental infections, CBA/J (Jackson Laboratories) mice were infected with

683 10 cysts from brain homogenate of Swiss Webster mice by i.p. injection in 200µl PBS. Cysts from  
684 4 week-infected CBA/J brain homogenate were then used to infect animals in all experiments.

685

## 686 **Immunohistochemistry**

687 Mouse Tissue Immunofluorescence:

688 Reporter mice were perfused with 30 mL PBS followed by 30 mL 4% PFA (Electron Microscopy  
689 Sciences). All non-reporter strains were not perfused with PFA. Brains were cut along the midline  
690 and post-fixed in 4% PFA for 24h at 4°C. Brains were then cryoprotected in 30% sucrose (Sigma)  
691 for 24h at 4°C, embedded in OCT (Tissue Tek), and frozen on dry ice. Samples were then stored  
692 at -20°C. 40 µm sections were cut using a CM 1950 cryostat (Leica) and placed into a 24-well  
693 plate containing PBS. Sections were blocked in PBS containing 2% goat or donkey serum  
694 (Jackson ImmunoResearch), 0.1% triton, 0.05% Tween 20, and 1% BSA for 1h at RT. Sections  
695 were then incubated with primary antibody diluted in blocking buffer at 4°C overnight. Sections  
696 were washed the following day and incubated with secondary antibody in blocking buffer at room  
697 temperature for 1h. Sections were then washed and incubated with DAPI (Thermo Scientific) for  
698 5 min at RT. Sections were then mounted onto Superfrost microscope slides (Fisherbrand) with  
699 aquamount (Lerner Laboratories) and coverslipped (Fisherbrand). Slides were stored at 4°C  
700 before use. Images were captured using an TCS SP8 confocal microscope (Leica) and analyzed  
701 using Imaris (Bitplane) software. Volumetric analysis was achieved using the surfaces feature of  
702 Imaris.

703

704 Human tissue Immunofluorescence:

705 Slides containing 4 µm sections of human brain tissue were received from the UVA Biorepository  
706 and Tissue Research Facility and de-paraffinized in a gradient from 100% xylene (Fisher) to 50%  
707 ethanol (Decon Laboratories). Slides were then washed in running water and distilled water.

708 Antigen retrieval was performed by incubating slides in antigen retrieval buffer (10 mM sodium  
709 citrate, .05% Tween-20, pH 6.0) in an Aroma digital rice cooker for 45 min at 95°C. Slides were  
710 then washed in running water followed by PBS-TW. Slides were then incubated with primary and  
711 secondary antibodies as described above for mouse brain tissue. Prior to imaging,  
712 Autofluorescence Eliminator Reagent was applied per the manufacturer's instructions (EMD  
713 Millipore).

714

715 Hematoxylin and Eosin Staining:

716 Brain tissue was fixed in 10% formalin and hematoxylin and eosin staining was performed by the  
717 UVA Research Histology Core. Images were acquired on a Brightfield DM 2000 LED microscope  
718 (Leica).

719

#### 720 **Tissue processing and flow cytometry**

721 PBS-perfused whole brains were collected in 4 mL of complete RPMI (cRPMI)(10% fetal bovine  
722 serum, 1% NEAA, 1% pen/strep, 1% sodium pyruvate, 0.1%  $\beta$ -mercaptoethanol). Papain  
723 digestion was performed for the chimera experiment. To perform papain digestion, brains were  
724 cut into 6 pieces and incubated in 5 mL HBSS containing 50U/mL DNase (Roche), and 4U/mL  
725 papain (Worthington-Biochem) for 45 min at 37°C. Tissue was triturated first with a large bore  
726 glass pipette tip, and twice with a small-bore pipette tip every 15 min. In all other experiments  
727 collagenase/dispase was used to digest brain tissue. To perform collagenase/dispase digestion,  
728 perfused brains were minced using a razor blade and passed through an 18-gauge needle. Brains  
729 were then digested with 0.227mg/mL collagenase/dispase and 50U/mL DNase (Roche) for 1h at  
730 37°C. Following digestion, homogenate was strained through a 70  $\mu$ m nylon filter (Corning).  
731 Samples were then pelleted and spun in 20 mL 40% Percoll at 650g for 25 min. Myelin was  
732 aspirated and cell pellets were washed with cRPMI. Finally, cells were resuspended in cRPMI

733 and cells were enumerated. Spleens were collected into 4 mL cRPMI and macerated through a  
734 40  $\mu$ M nylon filter (Corning). Samples were pelleted and resuspended in 2 mL RBC lysis buffer  
735 (0.16 M  $\text{NH}_4\text{Cl}$ ) Samples were then washed with cRPMI and resuspended for counting and  
736 staining. In cases of acute infection, 4mL of peritoneal lavage fluid was pelleted and resuspended  
737 in 2mL of cRPMI for counting and staining. Single cell suspensions were pipetted into a 96 well  
738 plate and pelleted. Samples were resuspended in 50  $\mu$ L Fc Block (1  $\mu$ g/ml 2.4G2 Ab (BioXCell),  
739 0.1% rat gamma globulin (Jackson Immunoresearch)) for 10 min. Cells were then surface stained  
740 in 50  $\mu$ L FACS buffer (PBS, 0.2% BSA, and 2 mM EDTA) for 30 min at 4°C. Following surface  
741 staining, cells were fixed for at least 30 min at 4°C with a fixation/permeabilization kit  
742 (eBioscience) and permeabilized (eBioscience). Samples were then incubated with intracellular  
743 antibodies in permeabilization buffer for 30 min at 4°C. Samples were run on a Gallios flow  
744 cytometer (Beckman Coulter), and analyzed using Flowjo software, v. 10.

745

#### 746 **qRT-PCR**

747 Perfused brain tissue (100 mg) was placed into bead beating tubes (Sarstedt) containing 1mL  
748 Trizol reagent (Ambion) and zirconia/silica beads (Biospec). Tissue was homogenized for 30  
749 seconds with a Mini-bead beater (Biospec) machine. RNA was extracted following  
750 homogenization per the Trizol Reagent manufacturer's instructions. Complementary DNA was  
751 then synthesized using a High Capacity Reverse Transcription Kit (Applied Biosystems). Taqman  
752 gene expression assays were acquired from Applied Biosystems and are listed in the key  
753 resources table. A 2X Taq-based mastermix (Bioline) was used for all reactions and run on a  
754 CFX384 Real-Time System (Bio-Rad). *Hprt* was used as the brain housekeeping gene and  
755 relative expression to wildtype controls was calculated as  $2^{(-\Delta\Delta\text{CT})}$ .

756

#### 757 ***T. gondii* cyst counts**

758 Brain tissue (100 mg) was minced with a razor in 2mL cRPMI. Brain tissue was then passed  
759 through an 18-gauge and 22-gauge needle. 30  $\mu$ L of resulting homogenate was pipetted onto a  
760 microscope slide (VWR) and counted on a Brightfield DM 2000 LED microscope (Leica). Cyst  
761 counts were extrapolated for whole brains.

762

### 763 **Bone marrow chimera**

764 Wildtype B6.SJL-Ptprc<sup>a</sup> Pepc<sup>b</sup>/BoyJ (C57BL/6 CD45.1) and ST2KO C57BL/6 mice were irradiated  
765 with 1000 rad. Irradiated mice received  $3 \times 10^6$  bone marrow cells from CD45.1 and CD45.2  
766 donors the same day. Bone marrow was transferred by retro-orbital i.v. injection under isoflurane  
767 anesthetization. All mice received sulfa-antibiotic water for 2 weeks post-irradiation and were  
768 given 6 weeks for bone marrow to reconstitute. At 6 weeks, tail blood was collected from  
769 representative mice and assessed for reconstitution by flow cytometry. Mice were then infected  
770 for 4 weeks prior to analysis.

771

### 772 **Statistical analyses**

773 Statistical analyses comparing two groups at one time point were done using a Student's t-test in  
774 Prism software, v. 7.0a. In instances where data from multiple infections were combined to  
775 illustrate natural variation in virulence, a randomized block ANOVA was performed using R v.  
776 3.4.4 statistical software to account for variability across experimental days. Genotype was  
777 modeled as a fixed effect and experimental day as a random effect. P values are indicated as  
778 follows: ns=not significant  $p > .05$ , \*  $p < .05$ , \*\*  $p < .01$ , \*\*\*  $p < .001$ . The number of mice per group,  
779 test used, and p values are denoted in each figure legend. Data was graphed using Prism  
780 software, v.7.0a.

781

782 **SUPPLEMENTARY FIGURES**

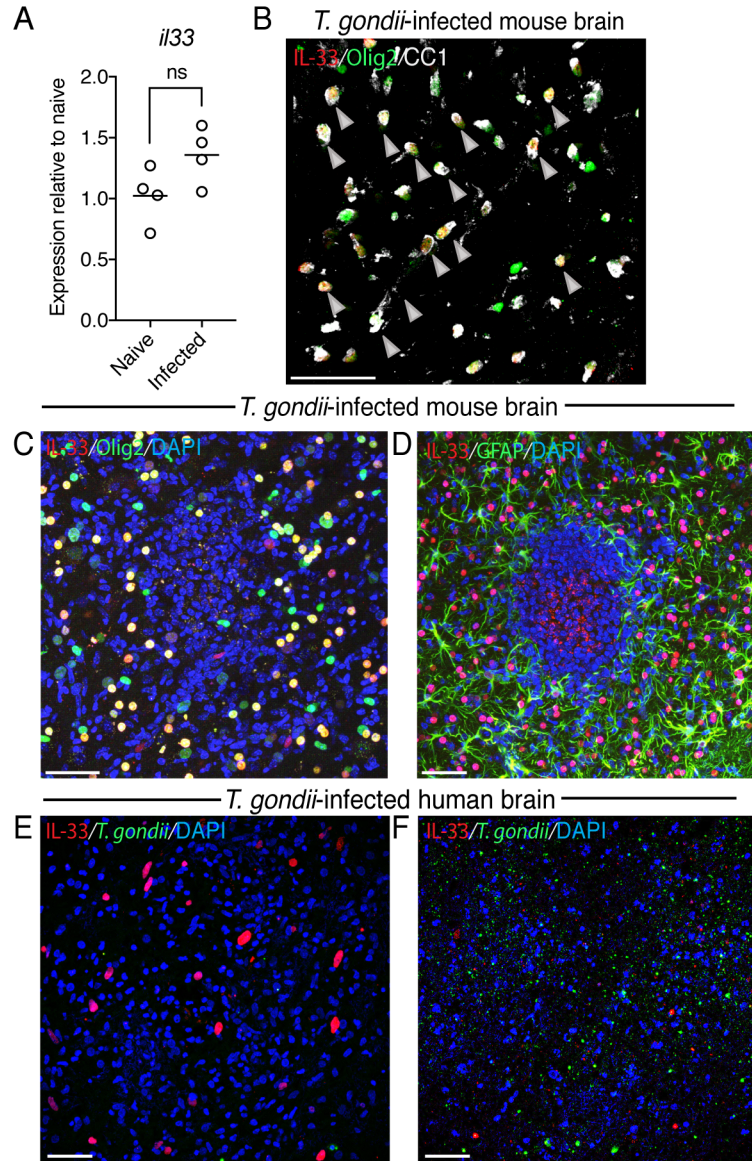

783

784 **Figure S1. IL-33 expression during *T. gondii* infection of mouse and human brain tissue**

785

786 (A) Quantitative real time PCR performed on whole brain homogenate of naïve and chronically

787 infected wildtype mice for detection of *il33* transcript, (n=4 per group, Student's t-test, performed once)

788 (B) Immunofluorescence staining for IL-33 (red), Olig2<sup>+</sup> oligodendrocytes (green), and CC1<sup>+</sup> mature

789 oligodendrocyte marker (white) in brain tissue of chronically infected wildtype mice. Gray arrows

790 denote co-localized CC1<sup>+</sup> Olig2<sup>+</sup> IL-33<sup>+</sup> cells

791 (C-D) Representative images of loss of Olig2<sup>+</sup> oligodendrocytes (C) and GFAP<sup>+</sup> astrocytes (D) in  
792 inflammatory brain regions of chronically infected wildtype mice. Tissue sections were stained for IL-  
793 33 (red), Olig2 (green) (C), or IL-33 (red), GFAP<sup>+</sup> (green) (D) – DAPI was used to visualize nuclei  
794 (blue)  
795 (E-F) Immunofluorescence staining of *T. gondii* infected human frontal cortex for intact IL-33 (red) in  
796 healthier-appearing regions with no *T. gondii* deposition (green) (E), and regions where *T. gondii* was  
797 present (F), scale bars = 50µm, ns=p>0.05, \*=p<0.05, \*\*=p<0.01, \*\*\*=p<0.001  
798



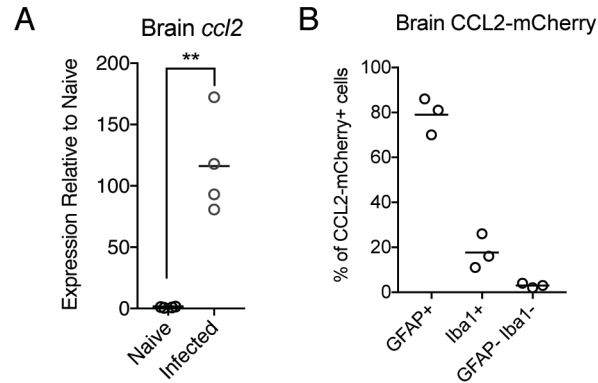

799

800 **Figure S2. Characterization of brain CCL2 expression during *T. gondii* infection**

801

802 (A) Quantitative real time PCR performed on whole brain homogenate of naïve and chronically

803 infected wildtype mice for detection of *cc12* transcript, (n=4 per group, Student's t-test, performed once)

804 (B) Quantification of CCL2-mCherry<sup>+</sup> cells by percentage of GFAP<sup>+</sup> astrocytes, Iba1<sup>+</sup> macrophages,

805 and GFAP<sup>-</sup> Iba1<sup>-</sup> cells, (n=3 per group, data points represent an average percentage from

806 approximately 300 cells per mouse, representative of 3 independent experiments)

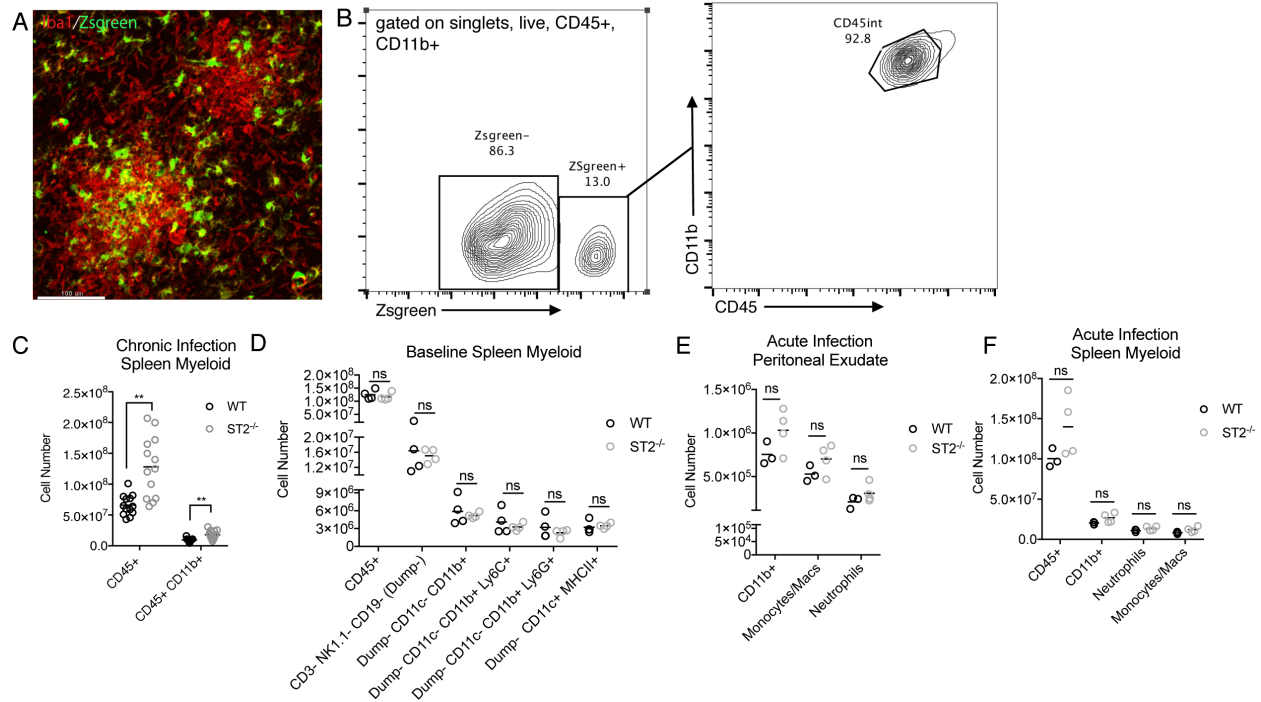

807

808 **Figure S3. Microglia reporter mice and peripheral myeloid cell responses to infection**

809 (A) Immunofluorescence of inflammatory foci in an infected CX3CR1-creERT2 x Ai6 (ZsGreen cre  
810 reporter) mouse – microglia are co-labeled by ZsGreen fluorescence and the macrophage marker Iba1  
811 (red), and peripherally-derived macrophages are Iba1<sup>+</sup> ZsGreen<sup>-</sup> scale bar = 100µm

812 (B) Frequency of ZsGreen<sup>+</sup> microglia which remain CD45<sup>int</sup> during chronic infection in a wildtype mouse  
813 by flow cytometry

814 (C) Flow cytometry measurement of CD45<sup>+</sup> CD11b<sup>+</sup> cells from chronically infected wildtype and  
815 ST2<sup>-/-</sup> spleens (n=3-4 per group, data was pooled from 5 experiments analyzed by randomized  
816 block ANOVA)

817 (D) Flow cytometry measurement of myeloid cell subsets in uninfected wildtype and ST2<sup>-/-</sup> spleens  
818 (n=4 per group, Student's t-test, representative of 2 independent experiments)

819 (E) Flow cytometry measurement of total CD11b<sup>+</sup> myeloid cells, Ly6C<sup>+</sup> monocytes and  
820 macrophages, and Ly6G<sup>+</sup> neutrophils from peritoneal lavage fluid of wildtype and ST2<sup>-/-</sup> mice  
821 infected for 9 days, n=3-4 per group, Student's t-test, representative of 2 independent  
822 experiments)

823 (F) Flow cytometry measurement of total CD45<sup>+</sup> immune cells, total CD11b<sup>+</sup> myeloid cells, Ly6C<sup>+</sup>  
824 monocytes and macrophages, and Ly6G<sup>+</sup> neutrophils from spleens of acutely infected (9 days)  
825 wildtype and ST2<sup>-/-</sup> mice, n=3-4 per group, Student's t-test, representative of 2 independent  
826 experiments) ns=p>0.05, \*=p<0.05, \*\*=p<0.01, \*\*\*=p<0.001

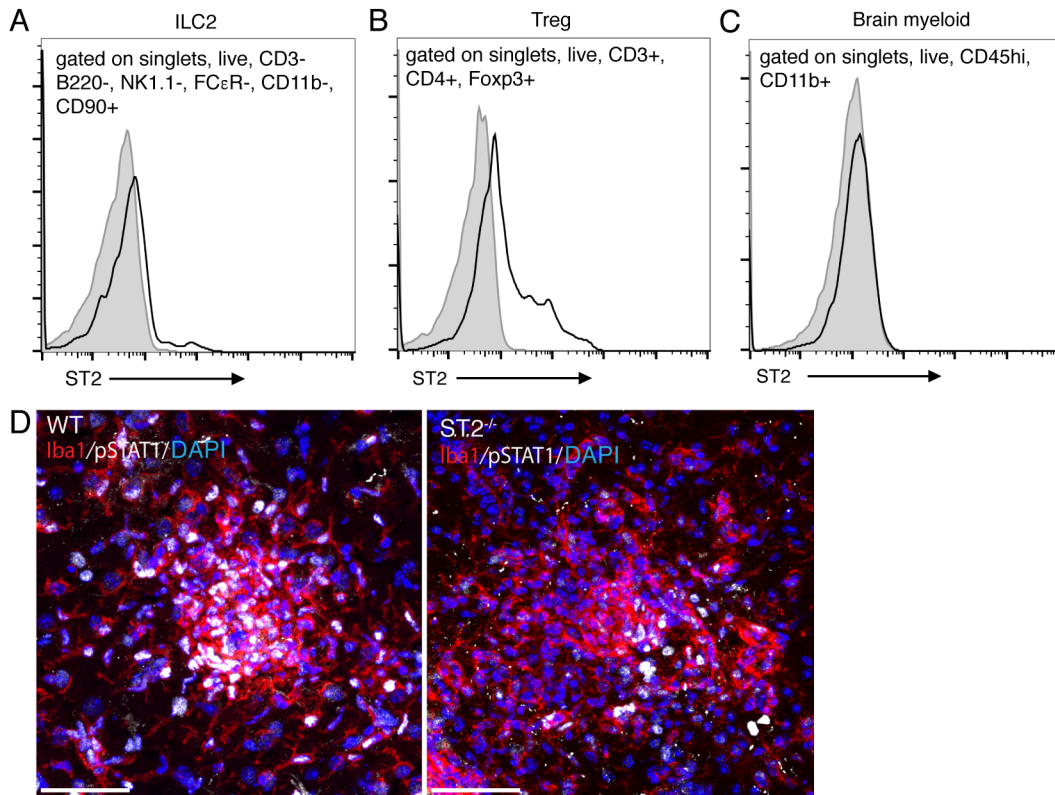

827  
828  
829  
830  
831

**Figure S4. ST2 expression and phosphorylated-STAT1 levels in the CNS during chronic *T. gondii* infection**

832 (A-B) Representative flow cytometry histograms demonstrating ST2 expression on type 2 innate  
833 lymphoid cells (A) and regulatory T cells (B) from brains of chronically infected wildtype mice (n=2,  
834 representative of 2 independent experiments)

835 (C) Representative flow cytometry histograms demonstrating lack of ST2 expression on CD45<sup>hi</sup>  
836 CD11b<sup>+</sup> infiltrating myeloid cells derived from brains of wildtype chronically infected mice, (n=2,  
837 representative of 2 independent experiments)

838 (D) Representative immunofluorescence of inflammatory foci in brains of chronically infected  
839 wildtype and ST2<sup>-/-</sup> mice, stained for Iba1<sup>+</sup> clustered macrophages (red) and pSTAT1 (white),  
840 DAPI was used to detect nuclei (blue), scale bar = 50 μm

841

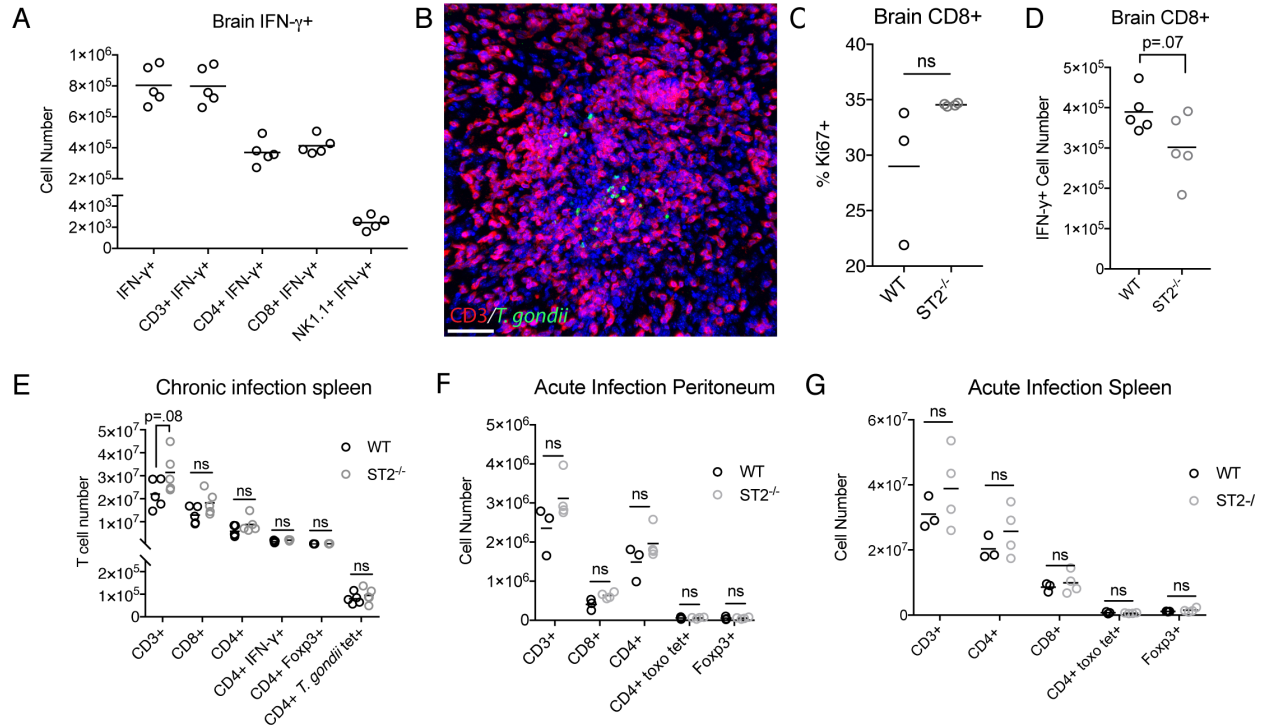

842

843

844 **Figure S5. Characterization of T cell responses in wildtype and ST2<sup>-/-</sup> mice during acute**  
845 **and chronic *T. gondii* infection**

846

847 (A) Flow cytometry measurement of IFN- $\gamma$ + CD3+ T cells and NK1.1+ NK cells from chronically  
848 infected brains of wildtype and ST2<sup>-/-</sup> mice, (n=5 per group, CD3 subsets are representative of 3  
849 independent experiments, and NK cell subset was performed once)

850 (B) Immunofluorescence staining of reactivated *T. gondii* (green) surrounded by CD3+ T cells  
851 (red) from a brain of a chronically infected wildtype mouse, scale bar = 50 $\mu$ m

852 (C) Flow cytometry measurement of Ki67+ frequency of brain CD8+ T cells from chronically  
853 infected wildtype and ST2<sup>-/-</sup> mice (n=3-4 mice per group, Student's t-test, performed once)

854 (D) Flow cytometry measurement of CD8+ IFN- $\gamma$ + cell number from brains of chronically infected  
855 wildtype and ST2<sup>-/-</sup> mice, (n=3-4 per group, Student's t-test, representative of 3 independent  
856 experiments)

857 (E) Flow cytometry measurement of CD3<sup>+</sup> T cell subsets from chronically infected wildtype and  
858 ST2<sup>-/-</sup> spleens (n=5 per group, Student's t-test, representative of 3 independent experiments)

859 (F) Flow cytometry measurement of CD3<sup>+</sup> T cell subsets from peritoneal lavage fluid of wildtype  
860 and ST2<sup>-/-</sup> mice infected for 9 days, (n=3-4 per group, Student's t-test, representative of 2  
861 independent experiments)

862 (G) Flow cytometry measurement of CD3<sup>+</sup> T cell subsets from acutely infected (9 days) wildtype  
863 and ST2<sup>-/-</sup> spleens, (n=3-4 per group, Student's t-test, representative of 2 independent  
864 experiments) ns=p>0.05, \*=p<0.05, \*\*=p<0.01, \*\*\*=p<0.001

865

866
